# Supplementary material
Source: PubMed Central journal article supplement (PMC5131708)
Supplement: NIHMS831393-supplement-Supplemental_Data.pdf [file NIHMS831393-supplement-Supplemental_Data.pdf]

## **Appendix A-E**

### **Table of contents for PROMIS short forms and item banks**

|                                      |                |
|--------------------------------------|----------------|
| <b>Appendix A: Pain</b>              | <b>Page 2</b>  |
| <b>Appendix B: Fatigue</b>           | <b>Page 15</b> |
| <b>Appendix C: Negative Affect</b>   | <b>Page 29</b> |
| <b>Appendix D: Physical Function</b> | <b>Page 42</b> |
| <b>Appendix E: Social Function</b>   | <b>Page 59</b> |

## **Appendix A**

### **PROMIS Pain Interference**

In these studies, we analyzed slightly different forms of the PROMIS Pain Interference instrument. For the COPD, Back Pain, and Depression studies, we analyzed the CAT v1.0 version, which adaptively selects items from the 1.0 bank. For the Rheumatoid Arthritis study, we administered the Short Form v1.0 6b. For the Cancer study, we administered a unique 10-item short form. All of the items in both of these short forms were also in the bank; because the items were calibrated together, T-scores obtained from any version (CAT and short-form) are comparable.

### **PROMIS Pain Behavior**

For PROMIS Pain Behavior, we exclusively administered the CAT v1.0 version. Studies that measured pain behavior were COPD, Back Pain, and Depression.

### **Instruments included in this Appendix:**

PROMIS Short Form v1.0 – Pain Behavior 7a

PROMIS Item Bank v1.0 – Pain Behavior

PROMIS Short Form v1.0 – Pain Interference 6b

PROMIS Item Bank v1.1 – Pain Interference\*

We recommend the use of the two short forms above. Users interested in CAT versions or for additional questions, please visit [www.assessmentcenter.net](http://www.assessmentcenter.net).

\*Pain Interference items administered in the Cancer study are marked with an asterisk (\*) next to the variable name. Version 1.1 differs from version 1.0 by a single item that was removed for proprietary reasons. This item, PAININ39, was also included in the Cancer study short form.

## Pain Behavior – Short Form 7a

Please respond to each item by marking one box per row.

**In the past 7 days....**

|          |                                                              | Had no<br>Pain                | Never                         | Rarely                        | Sometimes                     | Often                         | Always                        |
|----------|--------------------------------------------------------------|-------------------------------|-------------------------------|-------------------------------|-------------------------------|-------------------------------|-------------------------------|
| PAINBE2  | When I was in pain I became irritable.....                   | <input type="checkbox"/><br>1 | <input type="checkbox"/><br>2 | <input type="checkbox"/><br>3 | <input type="checkbox"/><br>4 | <input type="checkbox"/><br>5 | <input type="checkbox"/><br>6 |
| PAINBE3  | When I was in pain I grimaced.....                           | <input type="checkbox"/><br>1 | <input type="checkbox"/><br>2 | <input type="checkbox"/><br>3 | <input type="checkbox"/><br>4 | <input type="checkbox"/><br>5 | <input type="checkbox"/><br>6 |
| PAINBE8  | When I was in pain I moved extremely slowly.....             | <input type="checkbox"/><br>1 | <input type="checkbox"/><br>2 | <input type="checkbox"/><br>3 | <input type="checkbox"/><br>4 | <input type="checkbox"/><br>5 | <input type="checkbox"/><br>6 |
| PAINBE24 | When I was in pain I moved stiffly ...                       | <input type="checkbox"/><br>1 | <input type="checkbox"/><br>2 | <input type="checkbox"/><br>3 | <input type="checkbox"/><br>4 | <input type="checkbox"/><br>5 | <input type="checkbox"/><br>6 |
| PAINBE25 | When I was in pain I called out for someone to help me ..... | <input type="checkbox"/><br>1 | <input type="checkbox"/><br>2 | <input type="checkbox"/><br>3 | <input type="checkbox"/><br>4 | <input type="checkbox"/><br>5 | <input type="checkbox"/><br>6 |
| PAINBE37 | When I was in pain I isolated myself from others.....        | <input type="checkbox"/><br>1 | <input type="checkbox"/><br>2 | <input type="checkbox"/><br>3 | <input type="checkbox"/><br>4 | <input type="checkbox"/><br>5 | <input type="checkbox"/><br>6 |
| PAINBE45 | When I was in pain I thrashed .....                          | <input type="checkbox"/><br>1 | <input type="checkbox"/><br>2 | <input type="checkbox"/><br>3 | <input type="checkbox"/><br>4 | <input type="checkbox"/><br>5 | <input type="checkbox"/><br>6 |

## Pain Behavior – Calibrated Items

Please respond to each item by marking one box per row.

**In the past 7 days....**

|          |                                                    | Had no Pain                   | Never                         | Rarely                        | Sometimes                     | Often                         | Always                        |
|----------|----------------------------------------------------|-------------------------------|-------------------------------|-------------------------------|-------------------------------|-------------------------------|-------------------------------|
| PAINBE2  | When I was in pain I became irritable.....         | <input type="checkbox"/><br>1 | <input type="checkbox"/><br>2 | <input type="checkbox"/><br>3 | <input type="checkbox"/><br>4 | <input type="checkbox"/><br>5 | <input type="checkbox"/><br>6 |
| PAINBE3  | When I was in pain I grimaced.....                 | <input type="checkbox"/><br>1 | <input type="checkbox"/><br>2 | <input type="checkbox"/><br>3 | <input type="checkbox"/><br>4 | <input type="checkbox"/><br>5 | <input type="checkbox"/><br>6 |
| PAINBE6  | When I was in pain I would lie down .....          | <input type="checkbox"/><br>1 | <input type="checkbox"/><br>2 | <input type="checkbox"/><br>3 | <input type="checkbox"/><br>4 | <input type="checkbox"/><br>5 | <input type="checkbox"/><br>6 |
| PAINBE8  | When I was in pain I moved extremely slowly.....   | <input type="checkbox"/><br>1 | <input type="checkbox"/><br>2 | <input type="checkbox"/><br>3 | <input type="checkbox"/><br>4 | <input type="checkbox"/><br>5 | <input type="checkbox"/><br>6 |
| PAINBE9  | When I was in pain I became angry...               | <input type="checkbox"/><br>1 | <input type="checkbox"/><br>2 | <input type="checkbox"/><br>3 | <input type="checkbox"/><br>4 | <input type="checkbox"/><br>5 | <input type="checkbox"/><br>6 |
| PAINBE11 | When I was in pain I clenched my teeth.....        | <input type="checkbox"/><br>1 | <input type="checkbox"/><br>2 | <input type="checkbox"/><br>3 | <input type="checkbox"/><br>4 | <input type="checkbox"/><br>5 | <input type="checkbox"/><br>6 |
| PAINBE13 | When I was in pain I tried to stay very still..... | <input type="checkbox"/><br>1 | <input type="checkbox"/><br>2 | <input type="checkbox"/><br>3 | <input type="checkbox"/><br>4 | <input type="checkbox"/><br>5 | <input type="checkbox"/><br>6 |
| PAINBE16 | When I was in pain I appeared upset or sad.....    | <input type="checkbox"/><br>1 | <input type="checkbox"/><br>2 | <input type="checkbox"/><br>3 | <input type="checkbox"/><br>4 | <input type="checkbox"/><br>5 | <input type="checkbox"/><br>6 |
| PAINBE17 | When I was in pain I gasped.....                   | <input type="checkbox"/><br>1 | <input type="checkbox"/><br>2 | <input type="checkbox"/><br>3 | <input type="checkbox"/><br>4 | <input type="checkbox"/><br>5 | <input type="checkbox"/><br>6 |

**In the past 7 days....**

|          |                                                                                            | <b>Had no<br/>Pain</b>        | <b>Never</b>                  | <b>Rarely</b>                 | <b>Sometimes</b>              | <b>Often</b>                  | <b>Always</b>                 |
|----------|--------------------------------------------------------------------------------------------|-------------------------------|-------------------------------|-------------------------------|-------------------------------|-------------------------------|-------------------------------|
| PAINBE18 | When I was in pain I asked for help doing things that needed to be done .....              | <input type="checkbox"/><br>1 | <input type="checkbox"/><br>2 | <input type="checkbox"/><br>3 | <input type="checkbox"/><br>4 | <input type="checkbox"/><br>5 | <input type="checkbox"/><br>6 |
| PAINBE21 | When I was in pain it showed on my face (squinting eyes, opening eyes wide, frowning)..... | <input type="checkbox"/><br>1 | <input type="checkbox"/><br>2 | <input type="checkbox"/><br>3 | <input type="checkbox"/><br>4 | <input type="checkbox"/><br>5 | <input type="checkbox"/><br>6 |
| PAINBE22 | Pain caused me to bend over while walking.....                                             | <input type="checkbox"/><br>1 | <input type="checkbox"/><br>2 | <input type="checkbox"/><br>3 | <input type="checkbox"/><br>4 | <input type="checkbox"/><br>5 | <input type="checkbox"/><br>6 |
| PAINBE23 | When I was in pain I asked one or more people to leave me alone.....                       | <input type="checkbox"/><br>1 | <input type="checkbox"/><br>2 | <input type="checkbox"/><br>3 | <input type="checkbox"/><br>4 | <input type="checkbox"/><br>5 | <input type="checkbox"/><br>6 |
| PAINBE24 | When I was in pain I moved stiffly ...                                                     | <input type="checkbox"/><br>1 | <input type="checkbox"/><br>2 | <input type="checkbox"/><br>3 | <input type="checkbox"/><br>4 | <input type="checkbox"/><br>5 | <input type="checkbox"/><br>6 |
| PAINBE25 | When I was in pain I called out for someone to help me .....                               | <input type="checkbox"/><br>1 | <input type="checkbox"/><br>2 | <input type="checkbox"/><br>3 | <input type="checkbox"/><br>4 | <input type="checkbox"/><br>5 | <input type="checkbox"/><br>6 |
| PAINBE26 | Pain caused me to curl up in a ball ....                                                   | <input type="checkbox"/><br>1 | <input type="checkbox"/><br>2 | <input type="checkbox"/><br>3 | <input type="checkbox"/><br>4 | <input type="checkbox"/><br>5 | <input type="checkbox"/><br>6 |
| PAINBE27 | I had pain so bad it made me cry .....                                                     | <input type="checkbox"/><br>1 | <input type="checkbox"/><br>2 | <input type="checkbox"/><br>3 | <input type="checkbox"/><br>4 | <input type="checkbox"/><br>5 | <input type="checkbox"/><br>6 |
| PAINBE28 | When I was in pain I squirmed.....                                                         | <input type="checkbox"/><br>1 | <input type="checkbox"/><br>2 | <input type="checkbox"/><br>3 | <input type="checkbox"/><br>4 | <input type="checkbox"/><br>5 | <input type="checkbox"/><br>6 |

**In the past 7 days....**

|          |                                                                            | <b>Had no<br/>Pain</b>        | <b>Never</b>                  | <b>Rarely</b>                 | <b>Sometimes</b>              | <b>Often</b>                  | <b>Always</b>                 |
|----------|----------------------------------------------------------------------------|-------------------------------|-------------------------------|-------------------------------|-------------------------------|-------------------------------|-------------------------------|
| PAINBE29 | When I was in pain I used a cane or something else for support.....        | <input type="checkbox"/><br>1 | <input type="checkbox"/><br>2 | <input type="checkbox"/><br>3 | <input type="checkbox"/><br>4 | <input type="checkbox"/><br>5 | <input type="checkbox"/><br>6 |
| PAINBE31 | I limped because of pain .....                                             | <input type="checkbox"/><br>1 | <input type="checkbox"/><br>2 | <input type="checkbox"/><br>3 | <input type="checkbox"/><br>4 | <input type="checkbox"/><br>5 | <input type="checkbox"/><br>6 |
| PAINBE32 | When I was in pain I became quiet and withdrawn .....                      | <input type="checkbox"/><br>1 | <input type="checkbox"/><br>2 | <input type="checkbox"/><br>3 | <input type="checkbox"/><br>4 | <input type="checkbox"/><br>5 | <input type="checkbox"/><br>6 |
| PAINBE33 | When I was in pain I frowned .....                                         | <input type="checkbox"/><br>1 | <input type="checkbox"/><br>2 | <input type="checkbox"/><br>3 | <input type="checkbox"/><br>4 | <input type="checkbox"/><br>5 | <input type="checkbox"/><br>6 |
| PAINBE34 | When I was in pain I asked for help when walking or changing positions ... | <input type="checkbox"/><br>1 | <input type="checkbox"/><br>2 | <input type="checkbox"/><br>3 | <input type="checkbox"/><br>4 | <input type="checkbox"/><br>5 | <input type="checkbox"/><br>6 |
| PAINBE35 | When I was in pain I groaned.....                                          | <input type="checkbox"/><br>1 | <input type="checkbox"/><br>2 | <input type="checkbox"/><br>3 | <input type="checkbox"/><br>4 | <input type="checkbox"/><br>5 | <input type="checkbox"/><br>6 |
| PAINBE37 | When I was in pain I isolated myself from others.....                      | <input type="checkbox"/><br>1 | <input type="checkbox"/><br>2 | <input type="checkbox"/><br>3 | <input type="checkbox"/><br>4 | <input type="checkbox"/><br>5 | <input type="checkbox"/><br>6 |
| PAINBE38 | When I was in pain I drew my knees up .....                                | <input type="checkbox"/><br>1 | <input type="checkbox"/><br>2 | <input type="checkbox"/><br>3 | <input type="checkbox"/><br>4 | <input type="checkbox"/><br>5 | <input type="checkbox"/><br>6 |
| PAINBE39 | When I was in pain I moaned, whined or whimpered .....                     | <input type="checkbox"/><br>1 | <input type="checkbox"/><br>2 | <input type="checkbox"/><br>3 | <input type="checkbox"/><br>4 | <input type="checkbox"/><br>5 | <input type="checkbox"/><br>6 |

**In the past 7 days....**

|          |                                                                    | <b>Had no<br/>Pain</b>        | <b>Never</b>                  | <b>Rarely</b>                 | <b>Sometimes</b>              | <b>Often</b>                  | <b>Always</b>                 |
|----------|--------------------------------------------------------------------|-------------------------------|-------------------------------|-------------------------------|-------------------------------|-------------------------------|-------------------------------|
| PAINBE40 | When I was in pain I flung my arms or limbs around.....            | <input type="checkbox"/><br>1 | <input type="checkbox"/><br>2 | <input type="checkbox"/><br>3 | <input type="checkbox"/><br>4 | <input type="checkbox"/><br>5 | <input type="checkbox"/><br>6 |
| PAINBE41 | When I was in pain I screamed.....                                 | <input type="checkbox"/><br>1 | <input type="checkbox"/><br>2 | <input type="checkbox"/><br>3 | <input type="checkbox"/><br>4 | <input type="checkbox"/><br>5 | <input type="checkbox"/><br>6 |
| PAINBE42 | When I was in pain my upper body would tense up .....              | <input type="checkbox"/><br>1 | <input type="checkbox"/><br>2 | <input type="checkbox"/><br>3 | <input type="checkbox"/><br>4 | <input type="checkbox"/><br>5 | <input type="checkbox"/><br>6 |
| PAINBE43 | When I was in pain I walked carefully .....                        | <input type="checkbox"/><br>1 | <input type="checkbox"/><br>2 | <input type="checkbox"/><br>3 | <input type="checkbox"/><br>4 | <input type="checkbox"/><br>5 | <input type="checkbox"/><br>6 |
| PAINBE44 | When I was in pain I bit or pursed my lips .....                   | <input type="checkbox"/><br>1 | <input type="checkbox"/><br>2 | <input type="checkbox"/><br>3 | <input type="checkbox"/><br>4 | <input type="checkbox"/><br>5 | <input type="checkbox"/><br>6 |
| PAINBE45 | When I was in pain I thrashed .....                                | <input type="checkbox"/><br>1 | <input type="checkbox"/><br>2 | <input type="checkbox"/><br>3 | <input type="checkbox"/><br>4 | <input type="checkbox"/><br>5 | <input type="checkbox"/><br>6 |
| PAINBE46 | When I was in pain I protected the part of my body that hurt ..... | <input type="checkbox"/><br>1 | <input type="checkbox"/><br>2 | <input type="checkbox"/><br>3 | <input type="checkbox"/><br>4 | <input type="checkbox"/><br>5 | <input type="checkbox"/><br>6 |
| PAINBE47 | When I was in pain my body became stiff.....                       | <input type="checkbox"/><br>1 | <input type="checkbox"/><br>2 | <input type="checkbox"/><br>3 | <input type="checkbox"/><br>4 | <input type="checkbox"/><br>5 | <input type="checkbox"/><br>6 |
| PAINBE48 | When I was in pain I clenched my jaw or gritted my teeth.....      | <input type="checkbox"/><br>1 | <input type="checkbox"/><br>2 | <input type="checkbox"/><br>3 | <input type="checkbox"/><br>4 | <input type="checkbox"/><br>5 | <input type="checkbox"/><br>6 |

**In the past 7 days....**

|          |                                                                 | <b>Had no<br/>Pain</b>        | <b>Never</b>                  | <b>Rarely</b>                 | <b>Sometimes</b>              | <b>Often</b>                  | <b>Always</b>                 |
|----------|-----------------------------------------------------------------|-------------------------------|-------------------------------|-------------------------------|-------------------------------|-------------------------------|-------------------------------|
| PAINBE49 | When I was in pain I winced .....                               | <input type="checkbox"/><br>1 | <input type="checkbox"/><br>2 | <input type="checkbox"/><br>3 | <input type="checkbox"/><br>4 | <input type="checkbox"/><br>5 | <input type="checkbox"/><br>6 |
| PAINBE50 | When I was in pain I moved my limbs protectively .....          | <input type="checkbox"/><br>1 | <input type="checkbox"/><br>2 | <input type="checkbox"/><br>3 | <input type="checkbox"/><br>4 | <input type="checkbox"/><br>5 | <input type="checkbox"/><br>6 |
| PAINBE51 | When I was in pain I avoided physical contact with others ..... | <input type="checkbox"/><br>1 | <input type="checkbox"/><br>2 | <input type="checkbox"/><br>3 | <input type="checkbox"/><br>4 | <input type="checkbox"/><br>5 | <input type="checkbox"/><br>6 |



## Pain Interference – Short Form 6b

Please respond to each item by marking one box per row.

**In the past 7 days...**

|                              |                                                                                                                   | <u>Not at all</u>             | <u>A little bit</u>           | <u>Somewhat</u>               | <u>Quite a bit</u>            | <u>Very much</u>              |
|------------------------------|-------------------------------------------------------------------------------------------------------------------|-------------------------------|-------------------------------|-------------------------------|-------------------------------|-------------------------------|
| PAININ3                      | How much did pain interfere with your enjoyment of life?.....                                                     | <input type="checkbox"/><br>1 | <input type="checkbox"/><br>2 | <input type="checkbox"/><br>3 | <input type="checkbox"/><br>4 | <input type="checkbox"/><br>5 |
| PAININ8                      | How much did pain interfere with your ability to concentrate?.....                                                | <input type="checkbox"/><br>1 | <input type="checkbox"/><br>2 | <input type="checkbox"/><br>3 | <input type="checkbox"/><br>4 | <input type="checkbox"/><br>5 |
| PAININ9                      | How much did pain interfere with your day to day activities?.....                                                 | <input type="checkbox"/><br>1 | <input type="checkbox"/><br>2 | <input type="checkbox"/><br>3 | <input type="checkbox"/><br>4 | <input type="checkbox"/><br>5 |
| PAININ10                     | How much did pain interfere with your enjoyment of recreational activities?.....                                  | <input type="checkbox"/><br>1 | <input type="checkbox"/><br>2 | <input type="checkbox"/><br>3 | <input type="checkbox"/><br>4 | <input type="checkbox"/><br>5 |
| PAININ14                     | How much did pain interfere with doing your tasks away from home (e.g., getting groceries, running errands)?..... | <input type="checkbox"/><br>1 | <input type="checkbox"/><br>2 | <input type="checkbox"/><br>3 | <input type="checkbox"/><br>4 | <input type="checkbox"/><br>5 |
| <b>In the past 7 days...</b> |                                                                                                                   |                               |                               |                               |                               |                               |
|                              |                                                                                                                   | <u>Never</u>                  | <u>Rarely</u>                 | <u>Sometimes</u>              | <u>Often</u>                  | <u>Always</u>                 |
| PAININ26                     | How often did pain keep you from socializing with others?.....                                                    | <input type="checkbox"/><br>1 | <input type="checkbox"/><br>2 | <input type="checkbox"/><br>3 | <input type="checkbox"/><br>4 | <input type="checkbox"/><br>5 |

## Pain Interference

Please respond to each item by marking one box per row.

**In the past 7 days...**

|          |                                                                                          | Not at all                    | A little bit                  | Somewhat                      | Quite a bit                   | Very much                     |
|----------|------------------------------------------------------------------------------------------|-------------------------------|-------------------------------|-------------------------------|-------------------------------|-------------------------------|
| PAININ1  | How difficult was it for you to take in new information because of pain? .....           | <input type="checkbox"/><br>1 | <input type="checkbox"/><br>2 | <input type="checkbox"/><br>3 | <input type="checkbox"/><br>4 | <input type="checkbox"/><br>5 |
| PAININ3* | How much did pain interfere with your enjoyment of life? .....                           | <input type="checkbox"/><br>1 | <input type="checkbox"/><br>2 | <input type="checkbox"/><br>3 | <input type="checkbox"/><br>4 | <input type="checkbox"/><br>5 |
| PAININ5* | How much did pain interfere with your ability to participate in leisure activities?..... | <input type="checkbox"/><br>1 | <input type="checkbox"/><br>2 | <input type="checkbox"/><br>3 | <input type="checkbox"/><br>4 | <input type="checkbox"/><br>5 |
| PAININ6  | How much did pain interfere with your close personal relationships?.....                 | <input type="checkbox"/><br>1 | <input type="checkbox"/><br>2 | <input type="checkbox"/><br>3 | <input type="checkbox"/><br>4 | <input type="checkbox"/><br>5 |
| PAININ8* | How much did pain interfere with your ability to concentrate?.....                       | <input type="checkbox"/><br>1 | <input type="checkbox"/><br>2 | <input type="checkbox"/><br>3 | <input type="checkbox"/><br>4 | <input type="checkbox"/><br>5 |
| PAININ9* | How much did pain interfere with your day to day activities?.....                        | <input type="checkbox"/><br>1 | <input type="checkbox"/><br>2 | <input type="checkbox"/><br>3 | <input type="checkbox"/><br>4 | <input type="checkbox"/><br>5 |
| PAININ10 | How much did pain interfere with your enjoyment of recreational activities?.....         | <input type="checkbox"/><br>1 | <input type="checkbox"/><br>2 | <input type="checkbox"/><br>3 | <input type="checkbox"/><br>4 | <input type="checkbox"/><br>5 |

**In the past 7 days...**

|           |                                                                                     | <b>Not at all</b>             | <b>A little bit</b>           | <b>Somewhat</b>               | <b>Quite a bit</b>            | <b>Very much</b>              |
|-----------|-------------------------------------------------------------------------------------|-------------------------------|-------------------------------|-------------------------------|-------------------------------|-------------------------------|
| PAININ11  | How often did you feel emotionally tense because of your pain?.....                 | <input type="checkbox"/><br>1 | <input type="checkbox"/><br>2 | <input type="checkbox"/><br>3 | <input type="checkbox"/><br>4 | <input type="checkbox"/><br>5 |
| PAININ12  | How much did pain interfere with the things you usually do for fun? .....           | <input type="checkbox"/><br>1 | <input type="checkbox"/><br>2 | <input type="checkbox"/><br>3 | <input type="checkbox"/><br>4 | <input type="checkbox"/><br>5 |
| PAININ13  | How much did pain interfere with your family life?.....                             | <input type="checkbox"/><br>1 | <input type="checkbox"/><br>2 | <input type="checkbox"/><br>3 | <input type="checkbox"/><br>4 | <input type="checkbox"/><br>5 |
| PAININ17  | How much did pain interfere with your relationships with other people? .....        | <input type="checkbox"/><br>1 | <input type="checkbox"/><br>2 | <input type="checkbox"/><br>3 | <input type="checkbox"/><br>4 | <input type="checkbox"/><br>5 |
| PAININ18* | How much did pain interfere with your ability to work (include work at home)? ..... | <input type="checkbox"/><br>1 | <input type="checkbox"/><br>2 | <input type="checkbox"/><br>3 | <input type="checkbox"/><br>4 | <input type="checkbox"/><br>5 |
| PAININ19  | How much did pain make it difficult to fall asleep?.....                            | <input type="checkbox"/><br>1 | <input type="checkbox"/><br>2 | <input type="checkbox"/><br>3 | <input type="checkbox"/><br>4 | <input type="checkbox"/><br>5 |
| PAININ20  | How much did pain feel like a burden to you?.....                                   | <input type="checkbox"/><br>1 | <input type="checkbox"/><br>2 | <input type="checkbox"/><br>3 | <input type="checkbox"/><br>4 | <input type="checkbox"/><br>5 |
| PAININ22  | How much did pain interfere with work around the home?.....                         | <input type="checkbox"/><br>1 | <input type="checkbox"/><br>2 | <input type="checkbox"/><br>3 | <input type="checkbox"/><br>4 | <input type="checkbox"/><br>5 |

**In the past 7 days...**

|          |                                                                                                                       | <b>Not at all</b>             | <b>A little bit</b>           | <b>Somewhat</b>               | <b>Quite a bit</b>            | <b>Very much</b>              |
|----------|-----------------------------------------------------------------------------------------------------------------------|-------------------------------|-------------------------------|-------------------------------|-------------------------------|-------------------------------|
| PAININ31 | How much did pain interfere with your ability to participate in social activities? .....                              | <input type="checkbox"/><br>1 | <input type="checkbox"/><br>2 | <input type="checkbox"/><br>3 | <input type="checkbox"/><br>4 | <input type="checkbox"/><br>5 |
| PAININ34 | How much did pain interfere with your household chores?.....                                                          | <input type="checkbox"/><br>1 | <input type="checkbox"/><br>2 | <input type="checkbox"/><br>3 | <input type="checkbox"/><br>4 | <input type="checkbox"/><br>5 |
| PAININ35 | How much did pain interfere with your ability to make trips from home that kept you gone for more than 2 hours? ..... | <input type="checkbox"/><br>1 | <input type="checkbox"/><br>2 | <input type="checkbox"/><br>3 | <input type="checkbox"/><br>4 | <input type="checkbox"/><br>5 |
| PAININ36 | How much did pain interfere with your enjoyment of social activities?.....                                            | <input type="checkbox"/><br>1 | <input type="checkbox"/><br>2 | <input type="checkbox"/><br>3 | <input type="checkbox"/><br>4 | <input type="checkbox"/><br>5 |
| PAININ48 | How much did pain interfere with your ability to do household chores?.....                                            | <input type="checkbox"/><br>1 | <input type="checkbox"/><br>2 | <input type="checkbox"/><br>3 | <input type="checkbox"/><br>4 | <input type="checkbox"/><br>5 |
| PAININ49 | How much did pain interfere with your ability to remember things?.....                                                | <input type="checkbox"/><br>1 | <input type="checkbox"/><br>2 | <input type="checkbox"/><br>3 | <input type="checkbox"/><br>4 | <input type="checkbox"/><br>5 |
| PAININ56 | How irritable did you feel because of pain?.....                                                                      | <input type="checkbox"/><br>1 | <input type="checkbox"/><br>2 | <input type="checkbox"/><br>3 | <input type="checkbox"/><br>4 | <input type="checkbox"/><br>5 |
| PAININ14 | How much did pain interfere with doing your tasks away from home (e.g., getting groceries, running errands)?.....     | <input type="checkbox"/><br>1 | <input type="checkbox"/><br>2 | <input type="checkbox"/><br>3 | <input type="checkbox"/><br>4 | <input type="checkbox"/><br>5 |

**In the past 7 days...**

|           |                                                                                      | Never                         | Rarely                        | Sometimes                     | Often                         | Always                        |
|-----------|--------------------------------------------------------------------------------------|-------------------------------|-------------------------------|-------------------------------|-------------------------------|-------------------------------|
| PAININ16  | How often did pain make you feel depressed?.....                                     | <input type="checkbox"/><br>1 | <input type="checkbox"/><br>2 | <input type="checkbox"/><br>3 | <input type="checkbox"/><br>4 | <input type="checkbox"/><br>5 |
| PAININ24  | How often was pain distressing to you? .....                                         | <input type="checkbox"/><br>1 | <input type="checkbox"/><br>2 | <input type="checkbox"/><br>3 | <input type="checkbox"/><br>4 | <input type="checkbox"/><br>5 |
| PAININ26  | How often did pain keep you from socializing with others?.....                       | <input type="checkbox"/><br>1 | <input type="checkbox"/><br>2 | <input type="checkbox"/><br>3 | <input type="checkbox"/><br>4 | <input type="checkbox"/><br>5 |
| PAININ29* | How often was your pain so severe you could think of nothing else?.....              | <input type="checkbox"/><br>1 | <input type="checkbox"/><br>2 | <input type="checkbox"/><br>3 | <input type="checkbox"/><br>4 | <input type="checkbox"/><br>5 |
| PAININ32* | How often did pain make you feel discouraged? .....                                  | <input type="checkbox"/><br>1 | <input type="checkbox"/><br>2 | <input type="checkbox"/><br>3 | <input type="checkbox"/><br>4 | <input type="checkbox"/><br>5 |
| PAININ37* | How often did pain make you feel anxious? .....                                      | <input type="checkbox"/><br>1 | <input type="checkbox"/><br>2 | <input type="checkbox"/><br>3 | <input type="checkbox"/><br>4 | <input type="checkbox"/><br>5 |
| PAININ38  | How often did you avoid social activities because it might make you hurt more? ..... | <input type="checkbox"/><br>1 | <input type="checkbox"/><br>2 | <input type="checkbox"/><br>3 | <input type="checkbox"/><br>4 | <input type="checkbox"/><br>5 |
| PAININ40  | How often did pain prevent you from walking more than 1 mile?.....                   | <input type="checkbox"/><br>1 | <input type="checkbox"/><br>2 | <input type="checkbox"/><br>3 | <input type="checkbox"/><br>4 | <input type="checkbox"/><br>5 |
| PAININ42  | How often did pain prevent you from standing for more than one hour? .....           | <input type="checkbox"/><br>1 | <input type="checkbox"/><br>2 | <input type="checkbox"/><br>3 | <input type="checkbox"/><br>4 | <input type="checkbox"/><br>5 |

**In the past 7 days...**

|                              |                                                                                                        | Never                         | Rarely                        | Sometimes                     | Often                         | Always                        |
|------------------------------|--------------------------------------------------------------------------------------------------------|-------------------------------|-------------------------------|-------------------------------|-------------------------------|-------------------------------|
| PAININ46*                    | How often did pain make it difficult for you to plan social activities? .....                          | <input type="checkbox"/><br>1 | <input type="checkbox"/><br>2 | <input type="checkbox"/><br>3 | <input type="checkbox"/><br>4 | <input type="checkbox"/><br>5 |
| PAININ47                     | How often did pain prevent you from standing for more than 30 minutes? .....                           | <input type="checkbox"/><br>1 | <input type="checkbox"/><br>2 | <input type="checkbox"/><br>3 | <input type="checkbox"/><br>4 | <input type="checkbox"/><br>5 |
| PAININ50                     | How often did pain prevent you from sitting for more than 30 minutes? .....                            | <input type="checkbox"/><br>1 | <input type="checkbox"/><br>2 | <input type="checkbox"/><br>3 | <input type="checkbox"/><br>4 | <input type="checkbox"/><br>5 |
| PAININ51                     | How often did pain prevent you from sitting for more than 10 minutes? .....                            | <input type="checkbox"/><br>1 | <input type="checkbox"/><br>2 | <input type="checkbox"/><br>3 | <input type="checkbox"/><br>4 | <input type="checkbox"/><br>5 |
| PAININ52                     | How often was it hard to plan social activities because you didn't know if you would be in pain? ..... | <input type="checkbox"/><br>1 | <input type="checkbox"/><br>2 | <input type="checkbox"/><br>3 | <input type="checkbox"/><br>4 | <input type="checkbox"/><br>5 |
| PAININ53                     | How often did pain restrict your social life to your home?.....                                        | <input type="checkbox"/><br>1 | <input type="checkbox"/><br>2 | <input type="checkbox"/><br>3 | <input type="checkbox"/><br>4 | <input type="checkbox"/><br>5 |
| PAININ55                     | How often did pain prevent you from sitting for more than one hour?.....                               | <input type="checkbox"/><br>1 | <input type="checkbox"/><br>2 | <input type="checkbox"/><br>3 | <input type="checkbox"/><br>4 | <input type="checkbox"/><br>5 |
| <b>In the past 7 days...</b> |                                                                                                        |                               | <b>Once a week or less</b>    | <b>Once every few days</b>    | <b>Once a day</b>             | <b>Every few hours</b>        |
| PAININ54                     | How often did pain keep you from getting into a standing position? .....                               | <input type="checkbox"/><br>1 | <input type="checkbox"/><br>2 | <input type="checkbox"/><br>3 | <input type="checkbox"/><br>4 | <input type="checkbox"/><br>5 |

## **Appendix B**

### **PROMIS Fatigue**

In these studies, we analyzed slightly different forms of the PROMIS Fatigue instrument. For the COPD, Back Pain, Depression, and CHF studies, we analyzed the CAT v1.0 version, which adaptively selects items from the 1.0 bank. For the Rheumatoid Arthritis and Cancer studies, we administered the Short Form 7a.

### **Instruments included in this Appendix:**

PROMIS Short Form v1.0 – Fatigue 7a

PROMIS Item Bank v1.0 – Fatigue

We recommend the use of the short form above. Users interested in CAT versions or for additional questions, please visit [www.assessmentcenter.net](http://www.assessmentcenter.net).

## Fatigue - Short Form 7a

Please respond to each question by marking one box per row.

In the past 7 days...

|          |                                                                           | Never                         | Rarely                        | Sometimes                     | Often                         | Always                        |
|----------|---------------------------------------------------------------------------|-------------------------------|-------------------------------|-------------------------------|-------------------------------|-------------------------------|
| FATEXP20 | How often did you feel tired?.....                                        | <input type="checkbox"/><br>1 | <input type="checkbox"/><br>2 | <input type="checkbox"/><br>3 | <input type="checkbox"/><br>4 | <input type="checkbox"/><br>5 |
| FATEXP5  | How often did you experience extreme exhaustion?.....                     | <input type="checkbox"/><br>1 | <input type="checkbox"/><br>2 | <input type="checkbox"/><br>3 | <input type="checkbox"/><br>4 | <input type="checkbox"/><br>5 |
| FATEXP18 | How often did you run out of energy?.....                                 | <input type="checkbox"/><br>1 | <input type="checkbox"/><br>2 | <input type="checkbox"/><br>3 | <input type="checkbox"/><br>4 | <input type="checkbox"/><br>5 |
| FATIMP33 | How often did your fatigue limit you at work (include work at home)?..... | <input type="checkbox"/><br>1 | <input type="checkbox"/><br>2 | <input type="checkbox"/><br>3 | <input type="checkbox"/><br>4 | <input type="checkbox"/><br>5 |
| FATIMP30 | How often were you too tired to think clearly?.....                       | <input type="checkbox"/><br>1 | <input type="checkbox"/><br>2 | <input type="checkbox"/><br>3 | <input type="checkbox"/><br>4 | <input type="checkbox"/><br>5 |
| FATIMP21 | How often were you too tired to take a bath or shower?.....               | <input type="checkbox"/><br>1 | <input type="checkbox"/><br>2 | <input type="checkbox"/><br>3 | <input type="checkbox"/><br>4 | <input type="checkbox"/><br>5 |
| FATIMP40 | How often did you have enough energy to exercise strenuously?.....        | <input type="checkbox"/><br>5 | <input type="checkbox"/><br>4 | <input type="checkbox"/><br>3 | <input type="checkbox"/><br>2 | <input type="checkbox"/><br>1 |



### Fatigue – Calibrated Items

Please respond to each item by marking one box per row.

In the past 7 days...

|          |                                                                       | Never                         | Rarely                        | Sometimes                     | Often                         | Always                        |
|----------|-----------------------------------------------------------------------|-------------------------------|-------------------------------|-------------------------------|-------------------------------|-------------------------------|
| FATEXP02 | How often did you feel run-down?.....                                 | <input type="checkbox"/><br>1 | <input type="checkbox"/><br>2 | <input type="checkbox"/><br>3 | <input type="checkbox"/><br>4 | <input type="checkbox"/><br>5 |
| FATEXP05 | How often did you experience extreme exhaustion?.....                 | <input type="checkbox"/><br>1 | <input type="checkbox"/><br>2 | <input type="checkbox"/><br>3 | <input type="checkbox"/><br>4 | <input type="checkbox"/><br>5 |
| FATEXP06 | How often did you feel tired even when you hadn't done anything?..... | <input type="checkbox"/><br>1 | <input type="checkbox"/><br>2 | <input type="checkbox"/><br>3 | <input type="checkbox"/><br>4 | <input type="checkbox"/><br>5 |
| FATEXP07 | How often did you feel your fatigue was beyond your control?.....     | <input type="checkbox"/><br>1 | <input type="checkbox"/><br>2 | <input type="checkbox"/><br>3 | <input type="checkbox"/><br>4 | <input type="checkbox"/><br>5 |
| FATEXP16 | How often were you sluggish?.....                                     | <input type="checkbox"/><br>1 | <input type="checkbox"/><br>2 | <input type="checkbox"/><br>3 | <input type="checkbox"/><br>4 | <input type="checkbox"/><br>5 |
| FATEXP18 | How often did you run out of energy?.....                             | <input type="checkbox"/><br>1 | <input type="checkbox"/><br>2 | <input type="checkbox"/><br>3 | <input type="checkbox"/><br>4 | <input type="checkbox"/><br>5 |
| FATEXP19 | How often were you physically drained?.....                           | <input type="checkbox"/><br>1 | <input type="checkbox"/><br>2 | <input type="checkbox"/><br>3 | <input type="checkbox"/><br>4 | <input type="checkbox"/><br>5 |
| FATEXP20 | How often did you feel tired?.....                                    | <input type="checkbox"/><br>1 | <input type="checkbox"/><br>2 | <input type="checkbox"/><br>3 | <input type="checkbox"/><br>4 | <input type="checkbox"/><br>5 |

**In the past 7 days...**

|          |                                                                               | Never                         | Rarely                        | Sometimes                     | Often                         | Always                        |
|----------|-------------------------------------------------------------------------------|-------------------------------|-------------------------------|-------------------------------|-------------------------------|-------------------------------|
| FATEXP22 | How often were you bothered by your fatigue?.....                             | <input type="checkbox"/><br>1 | <input type="checkbox"/><br>2 | <input type="checkbox"/><br>3 | <input type="checkbox"/><br>4 | <input type="checkbox"/><br>5 |
| FATEXP24 | How often did you have enough energy to enjoy the things you do for fun?..... | <input type="checkbox"/><br>5 | <input type="checkbox"/><br>4 | <input type="checkbox"/><br>3 | <input type="checkbox"/><br>2 | <input type="checkbox"/><br>1 |
| FATEXP26 | How often were you too tired to enjoy life?.....                              | <input type="checkbox"/><br>1 | <input type="checkbox"/><br>2 | <input type="checkbox"/><br>3 | <input type="checkbox"/><br>4 | <input type="checkbox"/><br>5 |
| FATEXP28 | How often were you too tired to feel happy?.....                              | <input type="checkbox"/><br>1 | <input type="checkbox"/><br>2 | <input type="checkbox"/><br>3 | <input type="checkbox"/><br>4 | <input type="checkbox"/><br>5 |
| FATEXP29 | How often did you feel totally drained?....                                   | <input type="checkbox"/><br>1 | <input type="checkbox"/><br>2 | <input type="checkbox"/><br>3 | <input type="checkbox"/><br>4 | <input type="checkbox"/><br>5 |
| FATEXP31 | How often were you energetic?.....                                            | <input type="checkbox"/><br>5 | <input type="checkbox"/><br>4 | <input type="checkbox"/><br>3 | <input type="checkbox"/><br>2 | <input type="checkbox"/><br>1 |
| FATEXP48 | How often did you find yourself getting tired easily?.....                    | <input type="checkbox"/><br>1 | <input type="checkbox"/><br>2 | <input type="checkbox"/><br>3 | <input type="checkbox"/><br>4 | <input type="checkbox"/><br>5 |
| FATEXP49 | How often did you think about your fatigue?.....                              | <input type="checkbox"/><br>1 | <input type="checkbox"/><br>2 | <input type="checkbox"/><br>3 | <input type="checkbox"/><br>4 | <input type="checkbox"/><br>5 |
| FATEXP54 | How often did you have physical energy?.....                                  | <input type="checkbox"/><br>5 | <input type="checkbox"/><br>4 | <input type="checkbox"/><br>3 | <input type="checkbox"/><br>2 | <input type="checkbox"/><br>1 |

**In the past 7 days....**

|          |                                                                                            | Never                         | Rarely                        | Sometimes                     | Often                         | Always                        |
|----------|--------------------------------------------------------------------------------------------|-------------------------------|-------------------------------|-------------------------------|-------------------------------|-------------------------------|
| FATIMP03 | How often did you have to push yourself to get things done because of your fatigue?.....   | <input type="checkbox"/><br>1 | <input type="checkbox"/><br>2 | <input type="checkbox"/><br>3 | <input type="checkbox"/><br>4 | <input type="checkbox"/><br>5 |
| FATIMP04 | How often did your fatigue interfere with your social activities?.....                     | <input type="checkbox"/><br>1 | <input type="checkbox"/><br>2 | <input type="checkbox"/><br>3 | <input type="checkbox"/><br>4 | <input type="checkbox"/><br>5 |
| FATIMP05 | How often were you less effective at work due to your fatigue (include work at home)?..... | <input type="checkbox"/><br>1 | <input type="checkbox"/><br>2 | <input type="checkbox"/><br>3 | <input type="checkbox"/><br>4 | <input type="checkbox"/><br>5 |
| FATIMP06 | How often did your fatigue make you feel slowed down in your thinking?.....                | <input type="checkbox"/><br>1 | <input type="checkbox"/><br>2 | <input type="checkbox"/><br>3 | <input type="checkbox"/><br>4 | <input type="checkbox"/><br>5 |
| FATIMP08 | How often were you too tired to watch television? .....                                    | <input type="checkbox"/><br>1 | <input type="checkbox"/><br>2 | <input type="checkbox"/><br>3 | <input type="checkbox"/><br>4 | <input type="checkbox"/><br>5 |
| FATIMP09 | How often did your fatigue make it difficult to plan activities ahead of time?.....        | <input type="checkbox"/><br>1 | <input type="checkbox"/><br>2 | <input type="checkbox"/><br>3 | <input type="checkbox"/><br>4 | <input type="checkbox"/><br>5 |
| FATIMP10 | How often did your fatigue make it difficult to start anything new?.....                   | <input type="checkbox"/><br>1 | <input type="checkbox"/><br>2 | <input type="checkbox"/><br>3 | <input type="checkbox"/><br>4 | <input type="checkbox"/><br>5 |
| FATIMP11 | How often did your fatigue make you more forgetful?.....                                   | <input type="checkbox"/><br>1 | <input type="checkbox"/><br>2 | <input type="checkbox"/><br>3 | <input type="checkbox"/><br>4 | <input type="checkbox"/><br>5 |

**In the past 7 days...**

|          |                                                                                                                               | Never                         | Rarely                        | Sometimes                     | Often                         | Always                        |
|----------|-------------------------------------------------------------------------------------------------------------------------------|-------------------------------|-------------------------------|-------------------------------|-------------------------------|-------------------------------|
| FATIMP13 | How often were you too tired to do errands?.....                                                                              | <input type="checkbox"/><br>1 | <input type="checkbox"/><br>2 | <input type="checkbox"/><br>3 | <input type="checkbox"/><br>4 | <input type="checkbox"/><br>5 |
| FATIMP14 | How often did your fatigue make it difficult to organize your thoughts when doing things at work (include work at home)?..... | <input type="checkbox"/><br>1 | <input type="checkbox"/><br>2 | <input type="checkbox"/><br>3 | <input type="checkbox"/><br>4 | <input type="checkbox"/><br>5 |
| FATIMP15 | How often did your fatigue interfere with your ability to engage in recreational activities?.....                             | <input type="checkbox"/><br>1 | <input type="checkbox"/><br>2 | <input type="checkbox"/><br>3 | <input type="checkbox"/><br>4 | <input type="checkbox"/><br>5 |
| FATIMP16 | How often did you have trouble finishing things because of your fatigue?.....                                                 | <input type="checkbox"/><br>1 | <input type="checkbox"/><br>2 | <input type="checkbox"/><br>3 | <input type="checkbox"/><br>4 | <input type="checkbox"/><br>5 |
| FATIMP17 | How often did your fatigue make it difficult to make decisions?.....                                                          | <input type="checkbox"/><br>1 | <input type="checkbox"/><br>2 | <input type="checkbox"/><br>3 | <input type="checkbox"/><br>4 | <input type="checkbox"/><br>5 |
| FATIMP18 | How often did you have to limit your social activities because of your fatigue?.....                                          | <input type="checkbox"/><br>1 | <input type="checkbox"/><br>2 | <input type="checkbox"/><br>3 | <input type="checkbox"/><br>4 | <input type="checkbox"/><br>5 |

**In the past 7 days...**

|          |                                                                                                        | Never                         | Rarely                        | Sometimes                     | Often                         | Always                        |
|----------|--------------------------------------------------------------------------------------------------------|-------------------------------|-------------------------------|-------------------------------|-------------------------------|-------------------------------|
| FATIMP19 | How often were you too tired to do your household chores?.....                                         | <input type="checkbox"/><br>1 | <input type="checkbox"/><br>2 | <input type="checkbox"/><br>3 | <input type="checkbox"/><br>4 | <input type="checkbox"/><br>5 |
| FATIMP20 | How often did your fatigue make you feel less alert?.....                                              | <input type="checkbox"/><br>1 | <input type="checkbox"/><br>2 | <input type="checkbox"/><br>3 | <input type="checkbox"/><br>4 | <input type="checkbox"/><br>5 |
| FATIMP21 | How often were you too tired to take a bath or shower?.....                                            | <input type="checkbox"/><br>1 | <input type="checkbox"/><br>2 | <input type="checkbox"/><br>3 | <input type="checkbox"/><br>4 | <input type="checkbox"/><br>5 |
| FATIMP22 | How often did your fatigue make it difficult to organize your thoughts when doing things at home?..... | <input type="checkbox"/><br>1 | <input type="checkbox"/><br>2 | <input type="checkbox"/><br>3 | <input type="checkbox"/><br>4 | <input type="checkbox"/><br>5 |
| FATIMP24 | How often did you have trouble starting things because of your fatigue?.....                           | <input type="checkbox"/><br>1 | <input type="checkbox"/><br>2 | <input type="checkbox"/><br>3 | <input type="checkbox"/><br>4 | <input type="checkbox"/><br>5 |
| FATIMP25 | How often was it an effort to carry on a conversation because of your fatigue?.....                    | <input type="checkbox"/><br>1 | <input type="checkbox"/><br>2 | <input type="checkbox"/><br>3 | <input type="checkbox"/><br>4 | <input type="checkbox"/><br>5 |
| FATIMP26 | How often were you too tired to socialize with your family?.....                                       | <input type="checkbox"/><br>1 | <input type="checkbox"/><br>2 | <input type="checkbox"/><br>3 | <input type="checkbox"/><br>4 | <input type="checkbox"/><br>5 |
| FATIMP29 | How often were you too tired to leave the house?.....                                                  | <input type="checkbox"/><br>1 | <input type="checkbox"/><br>2 | <input type="checkbox"/><br>3 | <input type="checkbox"/><br>4 | <input type="checkbox"/><br>5 |

**In the past 7 days...**

|          |                                                                                                | Never                         | Rarely                        | Sometimes                     | Often                         | Always                        |
|----------|------------------------------------------------------------------------------------------------|-------------------------------|-------------------------------|-------------------------------|-------------------------------|-------------------------------|
| FATIMP30 | How often were you too tired to think clearly?.....                                            | <input type="checkbox"/><br>1 | <input type="checkbox"/><br>2 | <input type="checkbox"/><br>3 | <input type="checkbox"/><br>4 | <input type="checkbox"/><br>5 |
| FATIMP33 | How often did your fatigue limit you at work (include work at home)?.....                      | <input type="checkbox"/><br>1 | <input type="checkbox"/><br>2 | <input type="checkbox"/><br>3 | <input type="checkbox"/><br>4 | <input type="checkbox"/><br>5 |
| FATIMP40 | How often did you have enough energy to exercise strenuously? .....                            | <input type="checkbox"/><br>5 | <input type="checkbox"/><br>4 | <input type="checkbox"/><br>3 | <input type="checkbox"/><br>2 | <input type="checkbox"/><br>1 |
| FATIMP42 | How often were you less effective at home due to your fatigue?.....                            | <input type="checkbox"/><br>1 | <input type="checkbox"/><br>2 | <input type="checkbox"/><br>3 | <input type="checkbox"/><br>4 | <input type="checkbox"/><br>5 |
| FATIMP53 | How often were you too tired to take a short walk?.....                                        | <input type="checkbox"/><br>1 | <input type="checkbox"/><br>2 | <input type="checkbox"/><br>3 | <input type="checkbox"/><br>4 | <input type="checkbox"/><br>5 |
| FATIMP55 | How often did you have to force yourself to get up and do things because of your fatigue?..... | <input type="checkbox"/><br>1 | <input type="checkbox"/><br>2 | <input type="checkbox"/><br>3 | <input type="checkbox"/><br>4 | <input type="checkbox"/><br>5 |
| FATIMP56 | How often were you too tired to socialize with your friends?.....                              | <input type="checkbox"/><br>1 | <input type="checkbox"/><br>2 | <input type="checkbox"/><br>3 | <input type="checkbox"/><br>4 | <input type="checkbox"/><br>5 |

**In the past 7 days...**

|      |                                                                       | <b>Not at all</b>             | <b>A little bit</b>           | <b>Somewhat</b>               | <b>Quite a bit</b>            | <b>Very much</b>              |
|------|-----------------------------------------------------------------------|-------------------------------|-------------------------------|-------------------------------|-------------------------------|-------------------------------|
| AN1  | I feel listless ("washed out").....                                   | <input type="checkbox"/><br>1 | <input type="checkbox"/><br>2 | <input type="checkbox"/><br>3 | <input type="checkbox"/><br>4 | <input type="checkbox"/><br>5 |
| AN2  | I feel tired.....                                                     | <input type="checkbox"/><br>1 | <input type="checkbox"/><br>2 | <input type="checkbox"/><br>3 | <input type="checkbox"/><br>4 | <input type="checkbox"/><br>5 |
| AN3  | I have trouble <u>starting</u> things because I am tired.....         | <input type="checkbox"/><br>1 | <input type="checkbox"/><br>2 | <input type="checkbox"/><br>3 | <input type="checkbox"/><br>4 | <input type="checkbox"/><br>5 |
| AN4  | I have trouble <u>finishing</u> things because I am tired.....        | <input type="checkbox"/><br>1 | <input type="checkbox"/><br>2 | <input type="checkbox"/><br>3 | <input type="checkbox"/><br>4 | <input type="checkbox"/><br>5 |
| AN5  | I have energy.....                                                    | <input type="checkbox"/><br>5 | <input type="checkbox"/><br>4 | <input type="checkbox"/><br>3 | <input type="checkbox"/><br>2 | <input type="checkbox"/><br>1 |
| AN7  | I am able to do my usual activities.....                              | <input type="checkbox"/><br>5 | <input type="checkbox"/><br>4 | <input type="checkbox"/><br>3 | <input type="checkbox"/><br>2 | <input type="checkbox"/><br>1 |
| AN8  | I need to sleep during the day.....                                   | <input type="checkbox"/><br>1 | <input type="checkbox"/><br>2 | <input type="checkbox"/><br>3 | <input type="checkbox"/><br>4 | <input type="checkbox"/><br>5 |
| AN12 | I am too tired to eat.....                                            | <input type="checkbox"/><br>1 | <input type="checkbox"/><br>2 | <input type="checkbox"/><br>3 | <input type="checkbox"/><br>4 | <input type="checkbox"/><br>5 |
| AN14 | I need help doing my usual activities.....                            | <input type="checkbox"/><br>1 | <input type="checkbox"/><br>2 | <input type="checkbox"/><br>3 | <input type="checkbox"/><br>4 | <input type="checkbox"/><br>5 |
| AN15 | I am frustrated by being too tired to do the things I want to do..... | <input type="checkbox"/><br>1 | <input type="checkbox"/><br>2 | <input type="checkbox"/><br>3 | <input type="checkbox"/><br>4 | <input type="checkbox"/><br>5 |

**In the past 7 days...**

|          |                                                                            | <b>Not at all</b>             | <b>A little bit</b>           | <b>Somewhat</b>               | <b>Quite a bit</b>            | <b>Very much</b>              |
|----------|----------------------------------------------------------------------------|-------------------------------|-------------------------------|-------------------------------|-------------------------------|-------------------------------|
| AN16     | I have to limit my social activity because I am tired.....                 | <input type="checkbox"/><br>1 | <input type="checkbox"/><br>2 | <input type="checkbox"/><br>3 | <input type="checkbox"/><br>4 | <input type="checkbox"/><br>5 |
| FATEXP12 | To what degree did you feel tired even when you hadn't done anything?..... | <input type="checkbox"/><br>1 | <input type="checkbox"/><br>2 | <input type="checkbox"/><br>3 | <input type="checkbox"/><br>4 | <input type="checkbox"/><br>5 |
| FATEXP13 | How bushed were you on average?.....                                       | <input type="checkbox"/><br>1 | <input type="checkbox"/><br>2 | <input type="checkbox"/><br>3 | <input type="checkbox"/><br>4 | <input type="checkbox"/><br>5 |
| FATEXP21 | How fatigued were you when your fatigue was at its worst?.....             | <input type="checkbox"/><br>1 | <input type="checkbox"/><br>2 | <input type="checkbox"/><br>3 | <input type="checkbox"/><br>4 | <input type="checkbox"/><br>5 |
| FATEXP34 | How tired did you feel on average?.....                                    | <input type="checkbox"/><br>1 | <input type="checkbox"/><br>2 | <input type="checkbox"/><br>3 | <input type="checkbox"/><br>4 | <input type="checkbox"/><br>5 |
| FATEXP35 | How much were you bothered by your fatigue on average?.....                | <input type="checkbox"/><br>1 | <input type="checkbox"/><br>2 | <input type="checkbox"/><br>3 | <input type="checkbox"/><br>4 | <input type="checkbox"/><br>5 |
| FATEXP36 | How exhausted were you on average?.....                                    | <input type="checkbox"/><br>1 | <input type="checkbox"/><br>2 | <input type="checkbox"/><br>3 | <input type="checkbox"/><br>4 | <input type="checkbox"/><br>5 |
| FATEXP38 | How fatigued were you on the day you felt most fatigued?.....              | <input type="checkbox"/><br>1 | <input type="checkbox"/><br>2 | <input type="checkbox"/><br>3 | <input type="checkbox"/><br>4 | <input type="checkbox"/><br>5 |



**In the past 7 days...**

**Not at all    A little bit    Somewhat    Quite a bit    Very much**

|          |                                                                 | <input type="checkbox"/> |
|----------|-----------------------------------------------------------------|--------------------------|--------------------------|--------------------------|--------------------------|--------------------------|
|          |                                                                 | 1                        | 2                        | 3                        | 4                        | 5                        |
| FATEXP40 | How fatigued were you on average?.....                          | <input type="checkbox"/> |
| FATEXP41 | How run-down did you feel on average?.....                      | <input type="checkbox"/> |
| FATEXP42 | How much mental energy did you have on average?.....            | <input type="checkbox"/> |
| FATEXP43 | How physically drained were you on average?.....                | <input type="checkbox"/> |
| FATEXP44 | How energetic were you on average?.....                         | <input type="checkbox"/> |
| FATEXP45 | How sluggish were you on average?.....                          | <input type="checkbox"/> |
| FATEXP50 | How fatigued were you on the day you felt least fatigued?.....  | <input type="checkbox"/> |
| FATEXP51 | How easily did you find yourself getting tired on average?..... | <input type="checkbox"/> |
| FATEXP52 | How wiped out were you on average? .....                        | <input type="checkbox"/> |

**In the past 7 days...**

**Not at all    A little bit    Somewhat    Quite a bit    Very much**

|          |                                                                                                             | <input type="checkbox"/> |
|----------|-------------------------------------------------------------------------------------------------------------|--------------------------|--------------------------|--------------------------|--------------------------|--------------------------|
|          |                                                                                                             | 1                        | 2                        | 3                        | 4                        | 5                        |
| FATIMP01 | To what degree did you have to push yourself to get things done because of your fatigue?.....               | <input type="checkbox"/> |
| FATIMP02 | To what degree did your fatigue make you feel slowed down in your thinking?.....                            | <input type="checkbox"/> |
| FATIMP27 | To what degree did you have trouble starting things because of your fatigue?...                             | <input type="checkbox"/> |
| FATIMP28 | How hard was it for you to carry on a conversation because of your fatigue?....                             | <input type="checkbox"/> |
| FATIMP34 | To what degree did you have to limit your social activities because of your fatigue?.....                   | <input type="checkbox"/> |
| FATIMP35 | To what degree did your fatigue make it difficult to organize your thoughts when doing things at home?..... | <input type="checkbox"/> |
| FATIMP36 | To what degree did your fatigue make it difficult to start anything new?.....                               | <input type="checkbox"/> |

**In the past 7 days...**

**Not at all    A little bit    Somewhat    Quite a bit    Very much**

|          |                                                                                                                                    | <b>Not at all</b>             | <b>A little bit</b>           | <b>Somewhat</b>               | <b>Quite a bit</b>            | <b>Very much</b>              |
|----------|------------------------------------------------------------------------------------------------------------------------------------|-------------------------------|-------------------------------|-------------------------------|-------------------------------|-------------------------------|
| FATIMP37 | Due to your fatigue were you less effective at work (include work at home)?.....                                                   | <input type="checkbox"/><br>1 | <input type="checkbox"/><br>2 | <input type="checkbox"/><br>3 | <input type="checkbox"/><br>4 | <input type="checkbox"/><br>5 |
| FATIMP38 | To what degree did your fatigue make it difficult to make decisions?.....                                                          | <input type="checkbox"/><br>1 | <input type="checkbox"/><br>2 | <input type="checkbox"/><br>3 | <input type="checkbox"/><br>4 | <input type="checkbox"/><br>5 |
| FATIMP43 | To what degree did your fatigue make it difficult to organize your thoughts when doing things at work (include work at home)?..... | <input type="checkbox"/><br>1 | <input type="checkbox"/><br>2 | <input type="checkbox"/><br>3 | <input type="checkbox"/><br>4 | <input type="checkbox"/><br>5 |
| FATIMP44 | To what degree did your fatigue make you more forgetful?.....                                                                      | <input type="checkbox"/><br>1 | <input type="checkbox"/><br>2 | <input type="checkbox"/><br>3 | <input type="checkbox"/><br>4 | <input type="checkbox"/><br>5 |
| FATIMP45 | To what degree did your fatigue interfere with your ability to engage in recreational activities?.....                             | <input type="checkbox"/><br>1 | <input type="checkbox"/><br>2 | <input type="checkbox"/><br>3 | <input type="checkbox"/><br>4 | <input type="checkbox"/><br>5 |
| FATIMP47 | To what degree did you have to force yourself to get up and do things because of your fatigue?.....                                | <input type="checkbox"/><br>1 | <input type="checkbox"/><br>2 | <input type="checkbox"/><br>3 | <input type="checkbox"/><br>4 | <input type="checkbox"/><br>5 |
| FATIMP48 | To what degree did your fatigue interfere with your social activities?.....                                                        | <input type="checkbox"/><br>1 | <input type="checkbox"/><br>2 | <input type="checkbox"/><br>3 | <input type="checkbox"/><br>4 | <input type="checkbox"/><br>5 |

**In the past 7 days...**

**Not at all    A little bit    Somewhat    Quite a bit    Very much**

|          |                                                                                    |                               |                               |                               |                               |                               |
|----------|------------------------------------------------------------------------------------|-------------------------------|-------------------------------|-------------------------------|-------------------------------|-------------------------------|
| FATIMP49 | To what degree did your fatigue interfere with your physical functioning?.....     | <input type="checkbox"/><br>1 | <input type="checkbox"/><br>2 | <input type="checkbox"/><br>3 | <input type="checkbox"/><br>4 | <input type="checkbox"/><br>5 |
| FATIMP50 | Did fatigue make you less effective at home?.....                                  | <input type="checkbox"/><br>1 | <input type="checkbox"/><br>2 | <input type="checkbox"/><br>3 | <input type="checkbox"/><br>4 | <input type="checkbox"/><br>5 |
| FATIMP51 | To what degree did you have trouble finishing things because of your fatigue?..... | <input type="checkbox"/><br>1 | <input type="checkbox"/><br>2 | <input type="checkbox"/><br>3 | <input type="checkbox"/><br>4 | <input type="checkbox"/><br>5 |
| FATIMP52 | To what degree did your fatigue make you feel less alert?.....                     | <input type="checkbox"/><br>1 | <input type="checkbox"/><br>2 | <input type="checkbox"/><br>3 | <input type="checkbox"/><br>4 | <input type="checkbox"/><br>5 |
| HI7      | I feel fatigued.....                                                               | <input type="checkbox"/><br>1 | <input type="checkbox"/><br>2 | <input type="checkbox"/><br>3 | <input type="checkbox"/><br>4 | <input type="checkbox"/><br>5 |
| HI12     | I feel weak all over .....                                                         | <input type="checkbox"/><br>1 | <input type="checkbox"/><br>2 | <input type="checkbox"/><br>3 | <input type="checkbox"/><br>4 | <input type="checkbox"/><br>5 |

**In the past 7 days...**

**None    1 day    2-3 days    4-5 days    6-7 days**

|          |                                                              |                               |                               |                               |                               |                               |
|----------|--------------------------------------------------------------|-------------------------------|-------------------------------|-------------------------------|-------------------------------|-------------------------------|
| FATEXP46 | On how many days was your fatigue worse in the morning?..... | <input type="checkbox"/><br>1 | <input type="checkbox"/><br>2 | <input type="checkbox"/><br>3 | <input type="checkbox"/><br>4 | <input type="checkbox"/><br>5 |
| FATEXP56 | What was the level of your fatigue on most days?.....        | <input type="checkbox"/><br>1 | <input type="checkbox"/><br>2 | <input type="checkbox"/><br>3 | <input type="checkbox"/><br>4 | <input type="checkbox"/><br>5 |

## Appendix C

### **PROMIS Negative Affect (Depression, Anxiety, Anger)**

In these studies, we analyzed slightly different forms of the PROMIS negative affect instruments. For the COPD, Back Pain, Depression, and CHF studies, we analyzed the CAT v1.0 version, which adaptively selects items from the 1.0 bank. For the Cancer study, we administered unique short forms. All of the items in both of these short forms were also in the bank; because the items were calibrated together, T-scores obtained from any version (CAT and short-form) are comparable.

#### **Instruments included in this Appendix:**

PROMIS Short Form v1.1 – Anger 5a

PROMIS Item Bank v1.1 – Anger

PROMIS Short Form v1.0 – Anxiety 8a

PROMIS Item Bank v1.0 – Anxiety\*

PROMIS Short Form v1.0 – Depression 8a

PROMIS Item Bank v1.0 – Depression\*

The short forms listed above are recommended. Users interested in CAT versions or for additional questions, please visit [www.assessmentcenter.net](http://www.assessmentcenter.net).

\*Items administered in the Cancer study are in marked with an asterisk (\*) next to the variable name.

## Anger – Short Form 5a

Please respond to each item by marking one box per row.

**In the past 7 days...**

|         |                                           | Never                         | Rarely                        | Sometimes                     | Often                         | Always                        |
|---------|-------------------------------------------|-------------------------------|-------------------------------|-------------------------------|-------------------------------|-------------------------------|
| EDANG03 | I was irritated more than people knew ... | <input type="checkbox"/><br>1 | <input type="checkbox"/><br>2 | <input type="checkbox"/><br>3 | <input type="checkbox"/><br>4 | <input type="checkbox"/><br>5 |
| EDANG09 | I felt angry .....                        | <input type="checkbox"/><br>1 | <input type="checkbox"/><br>2 | <input type="checkbox"/><br>3 | <input type="checkbox"/><br>4 | <input type="checkbox"/><br>5 |
| EDANG15 | I felt like I was ready to explode .....  | <input type="checkbox"/><br>1 | <input type="checkbox"/><br>2 | <input type="checkbox"/><br>3 | <input type="checkbox"/><br>4 | <input type="checkbox"/><br>5 |
| EDANG30 | I was grouchy .....                       | <input type="checkbox"/><br>1 | <input type="checkbox"/><br>2 | <input type="checkbox"/><br>3 | <input type="checkbox"/><br>4 | <input type="checkbox"/><br>5 |
| EDANG35 | I felt annoyed.....                       | <input type="checkbox"/><br>1 | <input type="checkbox"/><br>2 | <input type="checkbox"/><br>3 | <input type="checkbox"/><br>4 | <input type="checkbox"/><br>5 |

## Anger - Calibrated Items

Please respond to each item by marking one box per row.

**In the past 7 days...**

|         |                                                                   | Never                         | Rarely                        | Sometimes                     | Often                         | Always                        |
|---------|-------------------------------------------------------------------|-------------------------------|-------------------------------|-------------------------------|-------------------------------|-------------------------------|
| EDANG01 | When I was frustrated, I let it show.....                         | <input type="checkbox"/><br>1 | <input type="checkbox"/><br>2 | <input type="checkbox"/><br>3 | <input type="checkbox"/><br>4 | <input type="checkbox"/><br>5 |
| EDANG03 | I was irritated more than people knew....                         | <input type="checkbox"/><br>1 | <input type="checkbox"/><br>2 | <input type="checkbox"/><br>3 | <input type="checkbox"/><br>4 | <input type="checkbox"/><br>5 |
| EDANG04 | I felt envious of others.....                                     | <input type="checkbox"/><br>1 | <input type="checkbox"/><br>2 | <input type="checkbox"/><br>3 | <input type="checkbox"/><br>4 | <input type="checkbox"/><br>5 |
| EDANG05 | I disagreed with people.....                                      | <input type="checkbox"/><br>1 | <input type="checkbox"/><br>2 | <input type="checkbox"/><br>3 | <input type="checkbox"/><br>4 | <input type="checkbox"/><br>5 |
| EDANG09 | I felt angry.....                                                 | <input type="checkbox"/><br>1 | <input type="checkbox"/><br>2 | <input type="checkbox"/><br>3 | <input type="checkbox"/><br>4 | <input type="checkbox"/><br>5 |
| EDANG10 | When I was mad at someone, I gave them the silent treatment ..... | <input type="checkbox"/><br>1 | <input type="checkbox"/><br>2 | <input type="checkbox"/><br>3 | <input type="checkbox"/><br>4 | <input type="checkbox"/><br>5 |
| EDANG11 | I felt like breaking things.....                                  | <input type="checkbox"/><br>1 | <input type="checkbox"/><br>2 | <input type="checkbox"/><br>3 | <input type="checkbox"/><br>4 | <input type="checkbox"/><br>5 |
| EDANG15 | I felt like I was ready to explode.....                           | <input type="checkbox"/><br>1 | <input type="checkbox"/><br>2 | <input type="checkbox"/><br>3 | <input type="checkbox"/><br>4 | <input type="checkbox"/><br>5 |
| EDANG16 | When I was angry, I sulked.....                                   | <input type="checkbox"/><br>1 | <input type="checkbox"/><br>2 | <input type="checkbox"/><br>3 | <input type="checkbox"/><br>4 | <input type="checkbox"/><br>5 |

**In the past 7 days...**

|         |                                                 | Never                         | Rarely                        | Sometimes                     | Often                         | Always                        |
|---------|-------------------------------------------------|-------------------------------|-------------------------------|-------------------------------|-------------------------------|-------------------------------|
| EDANG17 | I felt resentful when I didn't get my way...    | <input type="checkbox"/><br>1 | <input type="checkbox"/><br>2 | <input type="checkbox"/><br>3 | <input type="checkbox"/><br>4 | <input type="checkbox"/><br>5 |
| EDANG18 | I felt guilty about my anger.....               | <input type="checkbox"/><br>1 | <input type="checkbox"/><br>2 | <input type="checkbox"/><br>3 | <input type="checkbox"/><br>4 | <input type="checkbox"/><br>5 |
| EDANG21 | I felt bitter about things.....                 | <input type="checkbox"/><br>1 | <input type="checkbox"/><br>2 | <input type="checkbox"/><br>3 | <input type="checkbox"/><br>4 | <input type="checkbox"/><br>5 |
| EDANG22 | I felt that people were trying to anger me..... | <input type="checkbox"/><br>1 | <input type="checkbox"/><br>2 | <input type="checkbox"/><br>3 | <input type="checkbox"/><br>4 | <input type="checkbox"/><br>5 |
| EDANG26 | I held grudges towards others.....              | <input type="checkbox"/><br>1 | <input type="checkbox"/><br>2 | <input type="checkbox"/><br>3 | <input type="checkbox"/><br>4 | <input type="checkbox"/><br>5 |
| EDANG30 | I was grouchy.....                              | <input type="checkbox"/><br>1 | <input type="checkbox"/><br>2 | <input type="checkbox"/><br>3 | <input type="checkbox"/><br>4 | <input type="checkbox"/><br>5 |
| EDANG31 | I was stubborn with others.....                 | <input type="checkbox"/><br>1 | <input type="checkbox"/><br>2 | <input type="checkbox"/><br>3 | <input type="checkbox"/><br>4 | <input type="checkbox"/><br>5 |
| EDANG35 | I felt annoyed.....                             | <input type="checkbox"/><br>1 | <input type="checkbox"/><br>2 | <input type="checkbox"/><br>3 | <input type="checkbox"/><br>4 | <input type="checkbox"/><br>5 |
| EDANG37 | I had a bad temper.....                         | <input type="checkbox"/><br>1 | <input type="checkbox"/><br>2 | <input type="checkbox"/><br>3 | <input type="checkbox"/><br>4 | <input type="checkbox"/><br>5 |
| EDANG42 | I had trouble controlling my temper.....        | <input type="checkbox"/><br>1 | <input type="checkbox"/><br>2 | <input type="checkbox"/><br>3 | <input type="checkbox"/><br>4 | <input type="checkbox"/><br>5 |



**In the past 7 days...**

|         |                                             | <b>Never</b>                  | <b>Rarely</b>                 | <b>Sometimes</b>              | <b>Often</b>                  | <b>Always</b>                 |
|---------|---------------------------------------------|-------------------------------|-------------------------------|-------------------------------|-------------------------------|-------------------------------|
| EDANG48 | I felt like I needed help for my anger..... | <input type="checkbox"/><br>1 | <input type="checkbox"/><br>2 | <input type="checkbox"/><br>3 | <input type="checkbox"/><br>4 | <input type="checkbox"/><br>5 |
| EDANG55 | I felt like yelling at someone.....         | <input type="checkbox"/><br>1 | <input type="checkbox"/><br>2 | <input type="checkbox"/><br>3 | <input type="checkbox"/><br>4 | <input type="checkbox"/><br>5 |

**In the past 7 days...**

|         |                                            | <b>Not at all</b>             | <b>A little bit</b>           | <b>Somewhat</b>               | <b>Quite a bit</b>            | <b>Very Much</b>              |
|---------|--------------------------------------------|-------------------------------|-------------------------------|-------------------------------|-------------------------------|-------------------------------|
| EDANG56 | Just being around people irritated me..... | <input type="checkbox"/><br>1 | <input type="checkbox"/><br>2 | <input type="checkbox"/><br>3 | <input type="checkbox"/><br>4 | <input type="checkbox"/><br>5 |

## Anxiety – Short Form 8a

Please respond to each question or statement by marking one box per row.

**In the past 7 days...**

|              |                                                                  | Never                         | Rarely                        | Sometimes                     | Often                         | Always                        |
|--------------|------------------------------------------------------------------|-------------------------------|-------------------------------|-------------------------------|-------------------------------|-------------------------------|
| EDANX01<br>1 | I felt fearful.....                                              | <input type="checkbox"/><br>1 | <input type="checkbox"/><br>2 | <input type="checkbox"/><br>3 | <input type="checkbox"/><br>4 | <input type="checkbox"/><br>5 |
| EDANX40<br>2 | I found it hard to focus on anything other than my anxiety ..... | <input type="checkbox"/><br>1 | <input type="checkbox"/><br>2 | <input type="checkbox"/><br>3 | <input type="checkbox"/><br>4 | <input type="checkbox"/><br>5 |
| EDANX41<br>3 | My worries overwhelmed me.....                                   | <input type="checkbox"/><br>1 | <input type="checkbox"/><br>2 | <input type="checkbox"/><br>3 | <input type="checkbox"/><br>4 | <input type="checkbox"/><br>5 |
| EDANX53<br>4 | I felt uneasy .....                                              | <input type="checkbox"/><br>1 | <input type="checkbox"/><br>2 | <input type="checkbox"/><br>3 | <input type="checkbox"/><br>4 | <input type="checkbox"/><br>5 |
| EDANX46<br>5 | I felt nervous.....                                              | <input type="checkbox"/><br>1 | <input type="checkbox"/><br>2 | <input type="checkbox"/><br>3 | <input type="checkbox"/><br>4 | <input type="checkbox"/><br>5 |
| EDANX07<br>6 | I felt like I needed help for my anxiety .....                   | <input type="checkbox"/><br>1 | <input type="checkbox"/><br>2 | <input type="checkbox"/><br>3 | <input type="checkbox"/><br>4 | <input type="checkbox"/><br>5 |
| EDANX05<br>7 | I felt anxious .....                                             | <input type="checkbox"/><br>1 | <input type="checkbox"/><br>2 | <input type="checkbox"/><br>3 | <input type="checkbox"/><br>4 | <input type="checkbox"/><br>5 |
| EDANX54<br>8 | I felt tense .....                                               | <input type="checkbox"/><br>1 | <input type="checkbox"/><br>2 | <input type="checkbox"/><br>3 | <input type="checkbox"/><br>4 | <input type="checkbox"/><br>5 |

## Anxiety – Calibrated Items

Please respond to each item by marking one box per row.

In the past 7 days...

|          |                                                        | Never                         | Rarely                        | Sometimes                     | Often                         | Always                        |
|----------|--------------------------------------------------------|-------------------------------|-------------------------------|-------------------------------|-------------------------------|-------------------------------|
| EDANX01  | I felt fearful.....                                    | <input type="checkbox"/><br>1 | <input type="checkbox"/><br>2 | <input type="checkbox"/><br>3 | <input type="checkbox"/><br>4 | <input type="checkbox"/><br>5 |
| EDANX02  | I felt frightened.....                                 | <input type="checkbox"/><br>1 | <input type="checkbox"/><br>2 | <input type="checkbox"/><br>3 | <input type="checkbox"/><br>4 | <input type="checkbox"/><br>5 |
| EDANX03  | It scared me when I felt nervous .....                 | <input type="checkbox"/><br>1 | <input type="checkbox"/><br>2 | <input type="checkbox"/><br>3 | <input type="checkbox"/><br>4 | <input type="checkbox"/><br>5 |
| EDANX05* | I felt anxious.....                                    | <input type="checkbox"/><br>1 | <input type="checkbox"/><br>2 | <input type="checkbox"/><br>3 | <input type="checkbox"/><br>4 | <input type="checkbox"/><br>5 |
| EDANX07  | I felt like I needed help for my anxiety .....         | <input type="checkbox"/><br>1 | <input type="checkbox"/><br>2 | <input type="checkbox"/><br>3 | <input type="checkbox"/><br>4 | <input type="checkbox"/><br>5 |
| EDANX08  | I was concerned about my mental health ...             | <input type="checkbox"/><br>1 | <input type="checkbox"/><br>2 | <input type="checkbox"/><br>3 | <input type="checkbox"/><br>4 | <input type="checkbox"/><br>5 |
| EDANX12  | I felt upset.....                                      | <input type="checkbox"/><br>1 | <input type="checkbox"/><br>2 | <input type="checkbox"/><br>3 | <input type="checkbox"/><br>4 | <input type="checkbox"/><br>5 |
| EDANX13  | I had a racing or pounding heart.....                  | <input type="checkbox"/><br>1 | <input type="checkbox"/><br>2 | <input type="checkbox"/><br>3 | <input type="checkbox"/><br>4 | <input type="checkbox"/><br>5 |
| EDANX16  | I was anxious if my normal routine was disturbed ..... | <input type="checkbox"/><br>1 | <input type="checkbox"/><br>2 | <input type="checkbox"/><br>3 | <input type="checkbox"/><br>4 | <input type="checkbox"/><br>5 |

**In the past 7 days...**

|          |                                                                  | <b>Never</b>                  | <b>Rarely</b>                 | <b>Sometimes</b>              | <b>Often</b>                  | <b>Always</b>                 |
|----------|------------------------------------------------------------------|-------------------------------|-------------------------------|-------------------------------|-------------------------------|-------------------------------|
| EDANX18  | I had sudden feelings of panic.....                              | <input type="checkbox"/><br>1 | <input type="checkbox"/><br>2 | <input type="checkbox"/><br>3 | <input type="checkbox"/><br>4 | <input type="checkbox"/><br>5 |
| EDANX20* | I was easily startled .....                                      | <input type="checkbox"/><br>1 | <input type="checkbox"/><br>2 | <input type="checkbox"/><br>3 | <input type="checkbox"/><br>4 | <input type="checkbox"/><br>5 |
| EDANX21  | I had trouble paying attention.....                              | <input type="checkbox"/><br>1 | <input type="checkbox"/><br>2 | <input type="checkbox"/><br>3 | <input type="checkbox"/><br>4 | <input type="checkbox"/><br>5 |
| EDANX24  | I avoided public places or activities .....                      | <input type="checkbox"/><br>1 | <input type="checkbox"/><br>2 | <input type="checkbox"/><br>3 | <input type="checkbox"/><br>4 | <input type="checkbox"/><br>5 |
| EDANX26  | I felt fidgety.....                                              | <input type="checkbox"/><br>1 | <input type="checkbox"/><br>2 | <input type="checkbox"/><br>3 | <input type="checkbox"/><br>4 | <input type="checkbox"/><br>5 |
| EDANX27* | I felt something awful would happen .....                        | <input type="checkbox"/><br>1 | <input type="checkbox"/><br>2 | <input type="checkbox"/><br>3 | <input type="checkbox"/><br>4 | <input type="checkbox"/><br>5 |
| EDANX30* | I felt worried.....                                              | <input type="checkbox"/><br>1 | <input type="checkbox"/><br>2 | <input type="checkbox"/><br>3 | <input type="checkbox"/><br>4 | <input type="checkbox"/><br>5 |
| EDANX33  | I felt terrified .....                                           | <input type="checkbox"/><br>1 | <input type="checkbox"/><br>2 | <input type="checkbox"/><br>3 | <input type="checkbox"/><br>4 | <input type="checkbox"/><br>5 |
| EDANX37  | I worried about other people's reactions to me .....             | <input type="checkbox"/><br>1 | <input type="checkbox"/><br>2 | <input type="checkbox"/><br>3 | <input type="checkbox"/><br>4 | <input type="checkbox"/><br>5 |
| EDANX40  | I found it hard to focus on anything other than my anxiety ..... | <input type="checkbox"/><br>1 | <input type="checkbox"/><br>2 | <input type="checkbox"/><br>3 | <input type="checkbox"/><br>4 | <input type="checkbox"/><br>5 |

**In the past 7 days...**

|          |                                            | <b>Never</b>                  | <b>Rarely</b>                 | <b>Sometimes</b>              | <b>Often</b>                  | <b>Always</b>                 |
|----------|--------------------------------------------|-------------------------------|-------------------------------|-------------------------------|-------------------------------|-------------------------------|
| EDANX41* | My worries overwhelmed me .....            | <input type="checkbox"/><br>1 | <input type="checkbox"/><br>2 | <input type="checkbox"/><br>3 | <input type="checkbox"/><br>4 | <input type="checkbox"/><br>5 |
| EDANX44  | I had twitching or trembling muscles ..... | <input type="checkbox"/><br>1 | <input type="checkbox"/><br>2 | <input type="checkbox"/><br>3 | <input type="checkbox"/><br>4 | <input type="checkbox"/><br>5 |
| EDANX46  | I felt nervous .....                       | <input type="checkbox"/><br>1 | <input type="checkbox"/><br>2 | <input type="checkbox"/><br>3 | <input type="checkbox"/><br>4 | <input type="checkbox"/><br>5 |
| EDANX47* | I felt indecisive.....                     | <input type="checkbox"/><br>1 | <input type="checkbox"/><br>2 | <input type="checkbox"/><br>3 | <input type="checkbox"/><br>4 | <input type="checkbox"/><br>5 |
| EDANX48  | Many situations made me worry.....         | <input type="checkbox"/><br>1 | <input type="checkbox"/><br>2 | <input type="checkbox"/><br>3 | <input type="checkbox"/><br>4 | <input type="checkbox"/><br>5 |
| EDANX49  | I had difficulty sleeping .....            | <input type="checkbox"/><br>1 | <input type="checkbox"/><br>2 | <input type="checkbox"/><br>3 | <input type="checkbox"/><br>4 | <input type="checkbox"/><br>5 |
| EDANX51* | I had trouble relaxing .....               | <input type="checkbox"/><br>1 | <input type="checkbox"/><br>2 | <input type="checkbox"/><br>3 | <input type="checkbox"/><br>4 | <input type="checkbox"/><br>5 |
| EDANX53  | I felt uneasy.....                         | <input type="checkbox"/><br>1 | <input type="checkbox"/><br>2 | <input type="checkbox"/><br>3 | <input type="checkbox"/><br>4 | <input type="checkbox"/><br>5 |
| EDANX54  | I felt tense.....                          | <input type="checkbox"/><br>1 | <input type="checkbox"/><br>2 | <input type="checkbox"/><br>3 | <input type="checkbox"/><br>4 | <input type="checkbox"/><br>5 |
| EDANX55  | I had difficulty calming down.....         | <input type="checkbox"/><br>1 | <input type="checkbox"/><br>2 | <input type="checkbox"/><br>3 | <input type="checkbox"/><br>4 | <input type="checkbox"/><br>5 |

## Depression – Short Form 8a

Please respond to each question or statement by marking one box per row.

**In the past 7 days...**

|              |                                               | Never                         | Rarely                        | Sometimes                     | Often                         | Always                        |
|--------------|-----------------------------------------------|-------------------------------|-------------------------------|-------------------------------|-------------------------------|-------------------------------|
| EDDEP04<br>1 | I felt worthless .....                        | <input type="checkbox"/><br>1 | <input type="checkbox"/><br>2 | <input type="checkbox"/><br>3 | <input type="checkbox"/><br>4 | <input type="checkbox"/><br>5 |
| EDDEP06<br>2 | I felt helpless .....                         | <input type="checkbox"/><br>1 | <input type="checkbox"/><br>2 | <input type="checkbox"/><br>3 | <input type="checkbox"/><br>4 | <input type="checkbox"/><br>5 |
| EDDEP29<br>3 | I felt depressed .....                        | <input type="checkbox"/><br>1 | <input type="checkbox"/><br>2 | <input type="checkbox"/><br>3 | <input type="checkbox"/><br>4 | <input type="checkbox"/><br>5 |
| EDDEP41<br>4 | I felt hopeless .....                         | <input type="checkbox"/><br>1 | <input type="checkbox"/><br>2 | <input type="checkbox"/><br>3 | <input type="checkbox"/><br>4 | <input type="checkbox"/><br>5 |
| EDDEP22<br>5 | I felt like a failure .....                   | <input type="checkbox"/><br>1 | <input type="checkbox"/><br>2 | <input type="checkbox"/><br>3 | <input type="checkbox"/><br>4 | <input type="checkbox"/><br>5 |
| EDDEP36<br>6 | I felt unhappy .....                          | <input type="checkbox"/><br>1 | <input type="checkbox"/><br>2 | <input type="checkbox"/><br>3 | <input type="checkbox"/><br>4 | <input type="checkbox"/><br>5 |
| EDDEP05<br>7 | I felt that I had nothing to look forward to. | <input type="checkbox"/><br>1 | <input type="checkbox"/><br>2 | <input type="checkbox"/><br>3 | <input type="checkbox"/><br>4 | <input type="checkbox"/><br>5 |
| EDDEP09<br>8 | I felt that nothing could cheer me up.....    | <input type="checkbox"/><br>1 | <input type="checkbox"/><br>2 | <input type="checkbox"/><br>3 | <input type="checkbox"/><br>4 | <input type="checkbox"/><br>5 |

## Depression – Calibrated Items

Please respond to each item by marking one box per row.

In the past 7 days...

|         |                                                    | Never                         | Rarely                        | Sometimes                     | Often                         | Always                        |
|---------|----------------------------------------------------|-------------------------------|-------------------------------|-------------------------------|-------------------------------|-------------------------------|
| EDDEP04 | I felt worthless.....                              | <input type="checkbox"/><br>1 | <input type="checkbox"/><br>2 | <input type="checkbox"/><br>3 | <input type="checkbox"/><br>4 | <input type="checkbox"/><br>5 |
| EDDEP05 | I felt that I had nothing to look forward to ..... | <input type="checkbox"/><br>1 | <input type="checkbox"/><br>2 | <input type="checkbox"/><br>3 | <input type="checkbox"/><br>4 | <input type="checkbox"/><br>5 |
| EDDEP06 | I felt helpless.....                               | <input type="checkbox"/><br>1 | <input type="checkbox"/><br>2 | <input type="checkbox"/><br>3 | <input type="checkbox"/><br>4 | <input type="checkbox"/><br>5 |
| EDDEP07 | I withdrew from other people.....                  | <input type="checkbox"/><br>1 | <input type="checkbox"/><br>2 | <input type="checkbox"/><br>3 | <input type="checkbox"/><br>4 | <input type="checkbox"/><br>5 |
| EDDEP09 | I felt that nothing could cheer me up...           | <input type="checkbox"/><br>1 | <input type="checkbox"/><br>2 | <input type="checkbox"/><br>3 | <input type="checkbox"/><br>4 | <input type="checkbox"/><br>5 |
| EDDEP14 | I felt that I was not as good as other people..... | <input type="checkbox"/><br>1 | <input type="checkbox"/><br>2 | <input type="checkbox"/><br>3 | <input type="checkbox"/><br>4 | <input type="checkbox"/><br>5 |
| EDDEP17 | I felt sad.....                                    | <input type="checkbox"/><br>1 | <input type="checkbox"/><br>2 | <input type="checkbox"/><br>3 | <input type="checkbox"/><br>4 | <input type="checkbox"/><br>5 |
| EDDEP19 | I felt that I wanted to give up on everything..... | <input type="checkbox"/><br>1 | <input type="checkbox"/><br>2 | <input type="checkbox"/><br>3 | <input type="checkbox"/><br>4 | <input type="checkbox"/><br>5 |
| EDDEP21 | I felt that I was to blame for things.....         | <input type="checkbox"/><br>1 | <input type="checkbox"/><br>2 | <input type="checkbox"/><br>3 | <input type="checkbox"/><br>4 | <input type="checkbox"/><br>5 |

**In the past 7 days...**

|         |                                                       | <b>Never</b>                  | <b>Rarely</b>                 | <b>Sometimes</b>              | <b>Often</b>                  | <b>Always</b>                 |
|---------|-------------------------------------------------------|-------------------------------|-------------------------------|-------------------------------|-------------------------------|-------------------------------|
| EDDEP22 | I felt like a failure.....                            | <input type="checkbox"/><br>1 | <input type="checkbox"/><br>2 | <input type="checkbox"/><br>3 | <input type="checkbox"/><br>4 | <input type="checkbox"/><br>5 |
| EDDEP23 | I had trouble feeling close to people.....            | <input type="checkbox"/><br>1 | <input type="checkbox"/><br>2 | <input type="checkbox"/><br>3 | <input type="checkbox"/><br>4 | <input type="checkbox"/><br>5 |
| EDDEP26 | I felt disappointed in myself.....                    | <input type="checkbox"/><br>1 | <input type="checkbox"/><br>2 | <input type="checkbox"/><br>3 | <input type="checkbox"/><br>4 | <input type="checkbox"/><br>5 |
| EDDEP27 | I felt that I was not needed.....                     | <input type="checkbox"/><br>1 | <input type="checkbox"/><br>2 | <input type="checkbox"/><br>3 | <input type="checkbox"/><br>4 | <input type="checkbox"/><br>5 |
| EDDEP28 | I felt lonely.....                                    | <input type="checkbox"/><br>1 | <input type="checkbox"/><br>2 | <input type="checkbox"/><br>3 | <input type="checkbox"/><br>4 | <input type="checkbox"/><br>5 |
| EDDEP29 | I felt depressed.....                                 | <input type="checkbox"/><br>1 | <input type="checkbox"/><br>2 | <input type="checkbox"/><br>3 | <input type="checkbox"/><br>4 | <input type="checkbox"/><br>5 |
| EDDEP30 | I had trouble making decisions.....                   | <input type="checkbox"/><br>1 | <input type="checkbox"/><br>2 | <input type="checkbox"/><br>3 | <input type="checkbox"/><br>4 | <input type="checkbox"/><br>5 |
| EDDEP31 | I felt discouraged about the future.....              | <input type="checkbox"/><br>1 | <input type="checkbox"/><br>2 | <input type="checkbox"/><br>3 | <input type="checkbox"/><br>4 | <input type="checkbox"/><br>5 |
| EDDEP35 | I found that things in my life were overwhelming..... | <input type="checkbox"/><br>1 | <input type="checkbox"/><br>2 | <input type="checkbox"/><br>3 | <input type="checkbox"/><br>4 | <input type="checkbox"/><br>5 |
| EDDEP36 | I felt unhappy.....                                   | <input type="checkbox"/><br>1 | <input type="checkbox"/><br>2 | <input type="checkbox"/><br>3 | <input type="checkbox"/><br>4 | <input type="checkbox"/><br>5 |
| EDDEP39 | I felt I had no reason for living.....                | <input type="checkbox"/><br>1 | <input type="checkbox"/><br>2 | <input type="checkbox"/><br>3 | <input type="checkbox"/><br>4 | <input type="checkbox"/><br>5 |



**In the past 7 days...**

|         |                                          | <b>Never</b>                  | <b>Rarely</b>                 | <b>Sometimes</b>              | <b>Often</b>                  | <b>Always</b>                 |
|---------|------------------------------------------|-------------------------------|-------------------------------|-------------------------------|-------------------------------|-------------------------------|
| EDDEP41 | I felt hopeless.....                     | <input type="checkbox"/><br>1 | <input type="checkbox"/><br>2 | <input type="checkbox"/><br>3 | <input type="checkbox"/><br>4 | <input type="checkbox"/><br>5 |
| EDDEP42 | I felt ignored by people.....            | <input type="checkbox"/><br>1 | <input type="checkbox"/><br>2 | <input type="checkbox"/><br>3 | <input type="checkbox"/><br>4 | <input type="checkbox"/><br>5 |
| EDDEP44 | I felt upset for no reason.....          | <input type="checkbox"/><br>1 | <input type="checkbox"/><br>2 | <input type="checkbox"/><br>3 | <input type="checkbox"/><br>4 | <input type="checkbox"/><br>5 |
| EDDEP45 | I felt that nothing was interesting..... | <input type="checkbox"/><br>1 | <input type="checkbox"/><br>2 | <input type="checkbox"/><br>3 | <input type="checkbox"/><br>4 | <input type="checkbox"/><br>5 |
| EDDEP46 | I felt pessimistic.....                  | <input type="checkbox"/><br>1 | <input type="checkbox"/><br>2 | <input type="checkbox"/><br>3 | <input type="checkbox"/><br>4 | <input type="checkbox"/><br>5 |
| EDDEP48 | I felt that my life was empty.....       | <input type="checkbox"/><br>1 | <input type="checkbox"/><br>2 | <input type="checkbox"/><br>3 | <input type="checkbox"/><br>4 | <input type="checkbox"/><br>5 |
| EDDEP50 | I felt guilty.....                       | <input type="checkbox"/><br>1 | <input type="checkbox"/><br>2 | <input type="checkbox"/><br>3 | <input type="checkbox"/><br>4 | <input type="checkbox"/><br>5 |
| EDDEP54 | I felt emotionally exhausted.....        | <input type="checkbox"/><br>1 | <input type="checkbox"/><br>2 | <input type="checkbox"/><br>3 | <input type="checkbox"/><br>4 | <input type="checkbox"/><br>5 |

## Appendix D

### PROMIS Physical Function

In these studies, we analyzed slightly different forms of the PROMIS Physical Function instrument. For the COPD, Back Pain, and Depression studies, we analyzed the CAT v1.0 version, which adaptively selects items from the 1.0 bank. For the Rheumatoid Arthritis study, we administered the Short Form v1.0 10a. For the Cancer study, we administered a unique 10-item short form. All of the items in both of these short forms were also in the bank; because the items were calibrated together, T-scores obtained from any version (CAT and short-form) are comparable.

### Instruments included in this Appendix:

PROMIS Short Form v1.0 – Physical Function 10a

PROMIS Item Bank v1.2 – Physical Function\*

We recommend the use of the short form. Users interested in CAT versions or for additional questions, please visit [www.assessmentcenter.net](http://www.assessmentcenter.net).

\*Physical Function items administered in the Cancer study are marked with an asterisk (\*) next to the variable name. The original PROMIS Bank version v1.0 – Physical Function included 124 items after being tested in a diverse sample. Later, during an effort to translate instrument items into multiple languages, translation challenges were identified. Therefore, minor modifications to the English source items were required (e.g., metric equivalents to measurements such as “Over 10 pounds/ 5 kg” were added). These modifications (19 in total) resulted in the creation of a version 1.1 item bank. Later, version 1.2 was created by eliminating three items due to restrictions in their use: PFA7, PFC20, and PFC34.

## Physical Function – Short Form 10a

**Please respond to each item by marking one box per row.**

|        |                                                                                                                                              | <b>Not at all</b>             | <b>Very little</b>              | <b>Somewhat</b>               | <b>Quite a lot</b>            | <b>Cannot do</b>              |
|--------|----------------------------------------------------------------------------------------------------------------------------------------------|-------------------------------|---------------------------------|-------------------------------|-------------------------------|-------------------------------|
| PFA01* | Does your health now limit you in doing vigorous activities, such as running, lifting heavy objects, participating in strenuous sports?..... | <input type="checkbox"/><br>5 | <input type="checkbox"/><br>4   | <input type="checkbox"/><br>3 | <input type="checkbox"/><br>2 | <input type="checkbox"/><br>1 |
| PFC36  | Does your health now limit you in walking more than a mile?.....                                                                             | <input type="checkbox"/><br>5 | <input type="checkbox"/><br>4   | <input type="checkbox"/><br>3 | <input type="checkbox"/><br>2 | <input type="checkbox"/><br>1 |
| PFC37  | Does your health now limit you in climbing one flight of stairs?.....                                                                        | <input type="checkbox"/><br>5 | <input type="checkbox"/><br>4   | <input type="checkbox"/><br>3 | <input type="checkbox"/><br>2 | <input type="checkbox"/><br>1 |
| PFA05  | Does your health now limit you in lifting or carrying groceries?.....                                                                        | <input type="checkbox"/><br>5 | <input type="checkbox"/><br>4   | <input type="checkbox"/><br>3 | <input type="checkbox"/><br>2 | <input type="checkbox"/><br>1 |
| PFA03  | Does your health now limit you in bending, kneeling, or stooping?.....                                                                       | <input type="checkbox"/><br>5 | <input type="checkbox"/><br>4   | <input type="checkbox"/><br>3 | <input type="checkbox"/><br>2 | <input type="checkbox"/><br>1 |
|        |                                                                                                                                              | <b>Without any difficulty</b> | <b>With a little difficulty</b> | <b>With some difficulty</b>   | <b>With much difficulty</b>   | <b>Unable to do</b>           |
| PFA11  | Are you able to do chores such as vacuuming or yard work?.....                                                                               | <input type="checkbox"/><br>5 | <input type="checkbox"/><br>4   | <input type="checkbox"/><br>3 | <input type="checkbox"/><br>2 | <input type="checkbox"/><br>1 |
| PFA16  | Are you able to dress yourself, including tying shoelaces and doing buttons?.....                                                            | <input type="checkbox"/><br>5 | <input type="checkbox"/><br>4   | <input type="checkbox"/><br>3 | <input type="checkbox"/><br>2 | <input type="checkbox"/><br>1 |
| PFB26  | Are you able to shampoo your hair?.....                                                                                                      | <input type="checkbox"/><br>5 | <input type="checkbox"/><br>4   | <input type="checkbox"/><br>3 | <input type="checkbox"/><br>2 | <input type="checkbox"/><br>1 |
| PFA55  | Are you able to wash and dry your body?.....                                                                                                 | <input type="checkbox"/><br>5 | <input type="checkbox"/><br>4   | <input type="checkbox"/><br>3 | <input type="checkbox"/><br>2 | <input type="checkbox"/><br>1 |
| PFC45  | Are you able to get on and off the toilet?.....                                                                                              | <input type="checkbox"/><br>5 | <input type="checkbox"/><br>4   | <input type="checkbox"/><br>3 | <input type="checkbox"/><br>2 | <input type="checkbox"/><br>1 |

## Physical Function

Please respond to each item by marking one box per row.

|         |                                                                                                | Without<br>any<br>difficulty  | With a<br>little<br>difficulty | With<br>some<br>difficulty    | With<br>much<br>difficulty    | Unable<br>to do               |
|---------|------------------------------------------------------------------------------------------------|-------------------------------|--------------------------------|-------------------------------|-------------------------------|-------------------------------|
| PFA10   | Are you able to stand for one hour? .....                                                      | <input type="checkbox"/><br>5 | <input type="checkbox"/><br>4  | <input type="checkbox"/><br>3 | <input type="checkbox"/><br>2 | <input type="checkbox"/><br>1 |
| PFA11*  | Are you able to do chores such as vacuuming or yard work? .....                                | <input type="checkbox"/><br>5 | <input type="checkbox"/><br>4  | <input type="checkbox"/><br>3 | <input type="checkbox"/><br>2 | <input type="checkbox"/><br>1 |
| PFA12   | Are you able to push open a heavy door?.....                                                   | <input type="checkbox"/><br>5 | <input type="checkbox"/><br>4  | <input type="checkbox"/><br>3 | <input type="checkbox"/><br>2 | <input type="checkbox"/><br>1 |
| PFA13   | Are you able to exercise for an hour?.....                                                     | <input type="checkbox"/><br>5 | <input type="checkbox"/><br>4  | <input type="checkbox"/><br>3 | <input type="checkbox"/><br>2 | <input type="checkbox"/><br>1 |
| PFA14r1 | Are you able to carry a heavy object (over 10 pounds/5 kg)? .....                              | <input type="checkbox"/><br>5 | <input type="checkbox"/><br>4  | <input type="checkbox"/><br>3 | <input type="checkbox"/><br>2 | <input type="checkbox"/><br>1 |
| PFA15   | Are you able to stand up from an armless straight chair? .....                                 | <input type="checkbox"/><br>5 | <input type="checkbox"/><br>4  | <input type="checkbox"/><br>3 | <input type="checkbox"/><br>2 | <input type="checkbox"/><br>1 |
| PFA16r1 | Are you able to dress yourself, including tying shoelaces and buttoning up your clothes? ..... | <input type="checkbox"/><br>5 | <input type="checkbox"/><br>4  | <input type="checkbox"/><br>3 | <input type="checkbox"/><br>2 | <input type="checkbox"/><br>1 |
| PFA17   | Are you able to reach into a high cupboard?.....                                               | <input type="checkbox"/><br>5 | <input type="checkbox"/><br>4  | <input type="checkbox"/><br>3 | <input type="checkbox"/><br>2 | <input type="checkbox"/><br>1 |

|         |                                                                                          | Without<br>any<br>difficulty  | With a<br>little<br>difficulty | With<br>some<br>difficulty    | With<br>much<br>difficulty    | Unable<br>to do               |
|---------|------------------------------------------------------------------------------------------|-------------------------------|--------------------------------|-------------------------------|-------------------------------|-------------------------------|
| PFA18   | Are you able to use a hammer to pound a nail?.....                                       | <input type="checkbox"/><br>5 | <input type="checkbox"/><br>4  | <input type="checkbox"/><br>3 | <input type="checkbox"/><br>2 | <input type="checkbox"/><br>1 |
| PFA19r1 | Are you able to run or jog for two miles (3km)?...                                       | <input type="checkbox"/><br>5 | <input type="checkbox"/><br>4  | <input type="checkbox"/><br>3 | <input type="checkbox"/><br>2 | <input type="checkbox"/><br>1 |
| PFA20   | Are you able to cut your food using eating utensils?.....                                | <input type="checkbox"/><br>5 | <input type="checkbox"/><br>4  | <input type="checkbox"/><br>3 | <input type="checkbox"/><br>2 | <input type="checkbox"/><br>1 |
| PFA21*  | Are you able to go up and down stairs at a normal pace?.....                             | <input type="checkbox"/><br>5 | <input type="checkbox"/><br>4  | <input type="checkbox"/><br>3 | <input type="checkbox"/><br>2 | <input type="checkbox"/><br>1 |
| PFA22   | Are you able to open previously opened jars?.....                                        | <input type="checkbox"/><br>5 | <input type="checkbox"/><br>4  | <input type="checkbox"/><br>3 | <input type="checkbox"/><br>2 | <input type="checkbox"/><br>1 |
| PFA23   | Are you able to go for a walk of at least 15 minutes?.....                               | <input type="checkbox"/><br>5 | <input type="checkbox"/><br>4  | <input type="checkbox"/><br>3 | <input type="checkbox"/><br>2 | <input type="checkbox"/><br>1 |
| PFA25   | Are you able to do yard work like raking leaves, weeding, or pushing a lawn mower? ..... | <input type="checkbox"/><br>5 | <input type="checkbox"/><br>4  | <input type="checkbox"/><br>3 | <input type="checkbox"/><br>2 | <input type="checkbox"/><br>1 |
| PFA28   | Are you able to open a can with a hand can opener?.....                                  | <input type="checkbox"/><br>5 | <input type="checkbox"/><br>4  | <input type="checkbox"/><br>3 | <input type="checkbox"/><br>2 | <input type="checkbox"/><br>1 |

|         |                                                                                      | Without<br>any<br>difficulty  | With a<br>little<br>difficulty | With<br>some<br>difficulty    | With<br>much<br>difficulty    | Unable<br>to do               |
|---------|--------------------------------------------------------------------------------------|-------------------------------|--------------------------------|-------------------------------|-------------------------------|-------------------------------|
| PFA29r1 | Are you able to pull heavy objects (10 pounds/<br>5kg) towards yourself? .....       | <input type="checkbox"/><br>5 | <input type="checkbox"/><br>4  | <input type="checkbox"/><br>3 | <input type="checkbox"/><br>2 | <input type="checkbox"/><br>1 |
| PFA30   | Are you able to step up and down curbs?.....                                         | <input type="checkbox"/><br>5 | <input type="checkbox"/><br>4  | <input type="checkbox"/><br>3 | <input type="checkbox"/><br>2 | <input type="checkbox"/><br>1 |
| PFA31r1 | Are you able to get up from the floor from lying<br>on your back without help? ..... | <input type="checkbox"/><br>5 | <input type="checkbox"/><br>4  | <input type="checkbox"/><br>3 | <input type="checkbox"/><br>2 | <input type="checkbox"/><br>1 |
| PFA32   | Are you able to stand with your knees<br>straight?.....                              | <input type="checkbox"/><br>5 | <input type="checkbox"/><br>4  | <input type="checkbox"/><br>3 | <input type="checkbox"/><br>2 | <input type="checkbox"/><br>1 |
| PFA33   | Are you able to exercise hard for half an hour?.....                                 | <input type="checkbox"/><br>5 | <input type="checkbox"/><br>4  | <input type="checkbox"/><br>3 | <input type="checkbox"/><br>2 | <input type="checkbox"/><br>1 |
| PFA34   | Are you able to wash your back?.....                                                 | <input type="checkbox"/><br>5 | <input type="checkbox"/><br>4  | <input type="checkbox"/><br>3 | <input type="checkbox"/><br>2 | <input type="checkbox"/><br>1 |
| PFA35   | Are you able to open and close a zipper?.....                                        | <input type="checkbox"/><br>5 | <input type="checkbox"/><br>4  | <input type="checkbox"/><br>3 | <input type="checkbox"/><br>2 | <input type="checkbox"/><br>1 |
| PFA36   | Are you able to put on and take off a coat or<br>jacket?.....                        | <input type="checkbox"/><br>5 | <input type="checkbox"/><br>4  | <input type="checkbox"/><br>3 | <input type="checkbox"/><br>2 | <input type="checkbox"/><br>1 |
| PFA37   | Are you able to stand for short periods of<br>time?.....                             | <input type="checkbox"/><br>5 | <input type="checkbox"/><br>4  | <input type="checkbox"/><br>3 | <input type="checkbox"/><br>2 | <input type="checkbox"/><br>1 |

|         |                                                                    | Without<br>any<br>difficulty  | With a<br>little<br>difficulty | With<br>some<br>difficulty    | With<br>much<br>difficulty    | Unable<br>to do               |
|---------|--------------------------------------------------------------------|-------------------------------|--------------------------------|-------------------------------|-------------------------------|-------------------------------|
| PFA38   | Are you able to dry your back with a towel?.....                   | <input type="checkbox"/><br>5 | <input type="checkbox"/><br>4  | <input type="checkbox"/><br>3 | <input type="checkbox"/><br>2 | <input type="checkbox"/><br>1 |
| PFA39r1 | Are you able to run at a fast pace for two miles (3 km)?.....      | <input type="checkbox"/><br>5 | <input type="checkbox"/><br>4  | <input type="checkbox"/><br>3 | <input type="checkbox"/><br>2 | <input type="checkbox"/><br>1 |
| PFA40   | Are you able to turn a key in a lock?.....                         | <input type="checkbox"/><br>5 | <input type="checkbox"/><br>4  | <input type="checkbox"/><br>3 | <input type="checkbox"/><br>2 | <input type="checkbox"/><br>1 |
| PFA41   | Are you able to squat and get up?.....                             | <input type="checkbox"/><br>5 | <input type="checkbox"/><br>4  | <input type="checkbox"/><br>3 | <input type="checkbox"/><br>2 | <input type="checkbox"/><br>1 |
| PFA42   | Are you able to carry a laundry basket up a flight of stairs?..... | <input type="checkbox"/><br>5 | <input type="checkbox"/><br>4  | <input type="checkbox"/><br>3 | <input type="checkbox"/><br>2 | <input type="checkbox"/><br>1 |
| PFA43   | Are you able to write with a pen or pencil?.....                   | <input type="checkbox"/><br>5 | <input type="checkbox"/><br>4  | <input type="checkbox"/><br>3 | <input type="checkbox"/><br>2 | <input type="checkbox"/><br>1 |
| PFA44   | Are you able to put on a shirt or blouse?.....                     | <input type="checkbox"/><br>5 | <input type="checkbox"/><br>4  | <input type="checkbox"/><br>3 | <input type="checkbox"/><br>2 | <input type="checkbox"/><br>1 |
| PFA45   | Are you able to get out of bed into a chair?.....                  | <input type="checkbox"/><br>5 | <input type="checkbox"/><br>4  | <input type="checkbox"/><br>3 | <input type="checkbox"/><br>2 | <input type="checkbox"/><br>1 |
| PFA47   | Are you able to pull on trousers?.....                             | <input type="checkbox"/><br>5 | <input type="checkbox"/><br>4  | <input type="checkbox"/><br>3 | <input type="checkbox"/><br>2 | <input type="checkbox"/><br>1 |

|        |                                                             | Without<br>any<br>difficulty  | With a<br>little<br>difficulty | With<br>some<br>difficulty    | With<br>much<br>difficulty    | Unable<br>to do               |
|--------|-------------------------------------------------------------|-------------------------------|--------------------------------|-------------------------------|-------------------------------|-------------------------------|
| PFA48  | Are you able to peel fruit?.....                            | <input type="checkbox"/><br>5 | <input type="checkbox"/><br>4  | <input type="checkbox"/><br>3 | <input type="checkbox"/><br>2 | <input type="checkbox"/><br>1 |
| PFA49  | Are you able to bend or twist your back?.....               | <input type="checkbox"/><br>5 | <input type="checkbox"/><br>4  | <input type="checkbox"/><br>3 | <input type="checkbox"/><br>2 | <input type="checkbox"/><br>1 |
| PFA50  | Are you able to brush your teeth?.....                      | <input type="checkbox"/><br>5 | <input type="checkbox"/><br>4  | <input type="checkbox"/><br>3 | <input type="checkbox"/><br>2 | <input type="checkbox"/><br>1 |
| PFA51  | Are you able to sit on the edge of a bed?.....              | <input type="checkbox"/><br>5 | <input type="checkbox"/><br>4  | <input type="checkbox"/><br>3 | <input type="checkbox"/><br>2 | <input type="checkbox"/><br>1 |
| PFA52  | Are you able to tie your shoelaces?.....                    | <input type="checkbox"/><br>5 | <input type="checkbox"/><br>4  | <input type="checkbox"/><br>3 | <input type="checkbox"/><br>2 | <input type="checkbox"/><br>1 |
| PFA53* | Are you able to run errands and shop?.....                  | <input type="checkbox"/><br>5 | <input type="checkbox"/><br>4  | <input type="checkbox"/><br>3 | <input type="checkbox"/><br>2 | <input type="checkbox"/><br>1 |
| PFA54  | Are you able to button your shirt?.....                     | <input type="checkbox"/><br>5 | <input type="checkbox"/><br>4  | <input type="checkbox"/><br>3 | <input type="checkbox"/><br>2 | <input type="checkbox"/><br>1 |
| PFA55  | Are you able to wash and dry your body?.....                | <input type="checkbox"/><br>5 | <input type="checkbox"/><br>4  | <input type="checkbox"/><br>3 | <input type="checkbox"/><br>2 | <input type="checkbox"/><br>1 |
| PFA56* | Are you able to get in and out of a car?.....               | <input type="checkbox"/><br>5 | <input type="checkbox"/><br>4  | <input type="checkbox"/><br>3 | <input type="checkbox"/><br>2 | <input type="checkbox"/><br>1 |
| PFA8   | Are you able to move a chair from one room to another?..... | <input type="checkbox"/><br>5 | <input type="checkbox"/><br>4  | <input type="checkbox"/><br>3 | <input type="checkbox"/><br>2 | <input type="checkbox"/><br>1 |



|       |                                                                                        | Without<br>any<br>difficulty  | With a<br>little<br>difficulty | With<br>some<br>difficulty    | With<br>much<br>difficulty    | Unable<br>to do               |
|-------|----------------------------------------------------------------------------------------|-------------------------------|--------------------------------|-------------------------------|-------------------------------|-------------------------------|
| PFA9* | Are you able to bend down and pick up clothing from the floor?.....                    | <input type="checkbox"/><br>5 | <input type="checkbox"/><br>4  | <input type="checkbox"/><br>3 | <input type="checkbox"/><br>2 | <input type="checkbox"/><br>1 |
| PFB10 | Are you able to climb up five steps?.....                                              | <input type="checkbox"/><br>5 | <input type="checkbox"/><br>4  | <input type="checkbox"/><br>3 | <input type="checkbox"/><br>2 | <input type="checkbox"/><br>1 |
| PFB11 | Are you able to wash dishes, pots, and utensils by hand while standing at a sink?..... | <input type="checkbox"/><br>5 | <input type="checkbox"/><br>4  | <input type="checkbox"/><br>3 | <input type="checkbox"/><br>2 | <input type="checkbox"/><br>1 |
| PFB12 | Are you able to make a bed, including spreading and tucking in bed sheets?.....        | <input type="checkbox"/><br>5 | <input type="checkbox"/><br>4  | <input type="checkbox"/><br>3 | <input type="checkbox"/><br>2 | <input type="checkbox"/><br>1 |
| PFB13 | Are you able to carry a shopping bag or briefcase?.....                                | <input type="checkbox"/><br>5 | <input type="checkbox"/><br>4  | <input type="checkbox"/><br>3 | <input type="checkbox"/><br>2 | <input type="checkbox"/><br>1 |
| PFB14 | Are you able to take a tub bath?.....                                                  | <input type="checkbox"/><br>5 | <input type="checkbox"/><br>4  | <input type="checkbox"/><br>3 | <input type="checkbox"/><br>2 | <input type="checkbox"/><br>1 |
| PFB15 | Are you able to change the bulb in a table lamp?.....                                  | <input type="checkbox"/><br>5 | <input type="checkbox"/><br>4  | <input type="checkbox"/><br>3 | <input type="checkbox"/><br>2 | <input type="checkbox"/><br>1 |
| PFB16 | Are you able to press with your index finger (for example ringing a doorbell)?.....    | <input type="checkbox"/><br>5 | <input type="checkbox"/><br>4  | <input type="checkbox"/><br>3 | <input type="checkbox"/><br>2 | <input type="checkbox"/><br>1 |

|       |                                                                        | <b>Without<br/>any<br/>difficulty</b> | <b>With a<br/>little<br/>difficulty</b> | <b>With<br/>some<br/>difficulty</b> | <b>With<br/>much<br/>difficulty</b> | <b>Unable<br/>to do</b>       |
|-------|------------------------------------------------------------------------|---------------------------------------|-----------------------------------------|-------------------------------------|-------------------------------------|-------------------------------|
| PFB17 | Are you able to put on and take off your socks?....                    | <input type="checkbox"/><br>5         | <input type="checkbox"/><br>4           | <input type="checkbox"/><br>3       | <input type="checkbox"/><br>2       | <input type="checkbox"/><br>1 |
| PFB18 | Are you able to shave your face or apply<br>makeup?.....               | <input type="checkbox"/><br>5         | <input type="checkbox"/><br>4           | <input type="checkbox"/><br>3       | <input type="checkbox"/><br>2       | <input type="checkbox"/><br>1 |
| PFB19 | Are you able to squeeze a new tube of<br>toothpaste?.....              | <input type="checkbox"/><br>5         | <input type="checkbox"/><br>4           | <input type="checkbox"/><br>3       | <input type="checkbox"/><br>2       | <input type="checkbox"/><br>1 |
| PFB20 | Are you able to cut a piece of paper with<br>scissors?.....            | <input type="checkbox"/><br>5         | <input type="checkbox"/><br>4           | <input type="checkbox"/><br>3       | <input type="checkbox"/><br>2       | <input type="checkbox"/><br>1 |
| PFB21 | Are you able to pick up coins from a table<br>top?.....                | <input type="checkbox"/><br>5         | <input type="checkbox"/><br>4           | <input type="checkbox"/><br>3       | <input type="checkbox"/><br>2       | <input type="checkbox"/><br>1 |
| PFB22 | Are you able to hold a plate full of food?.....                        | <input type="checkbox"/><br>5         | <input type="checkbox"/><br>4           | <input type="checkbox"/><br>3       | <input type="checkbox"/><br>2       | <input type="checkbox"/><br>1 |
| PFB23 | Are you able to pour liquid from a bottle into a<br>glass?.....        | <input type="checkbox"/><br>5         | <input type="checkbox"/><br>4           | <input type="checkbox"/><br>3       | <input type="checkbox"/><br>2       | <input type="checkbox"/><br>1 |
| PFB24 | Are you able to run a short distance, such as to<br>catch a bus? ..... | <input type="checkbox"/><br>5         | <input type="checkbox"/><br>4           | <input type="checkbox"/><br>3       | <input type="checkbox"/><br>2       | <input type="checkbox"/><br>1 |

|          |                                                                 | Without<br>any<br>difficulty  | With a<br>little<br>difficulty | With<br>some<br>difficulty    | With<br>much<br>difficulty    | Unable<br>to do               |
|----------|-----------------------------------------------------------------|-------------------------------|--------------------------------|-------------------------------|-------------------------------|-------------------------------|
| PFB25    | Are you able to push open a door after turning the knob?.....   | <input type="checkbox"/><br>5 | <input type="checkbox"/><br>4  | <input type="checkbox"/><br>3 | <input type="checkbox"/><br>2 | <input type="checkbox"/><br>1 |
| PFB26    | Are you able to shampoo your hair?.....                         | <input type="checkbox"/><br>5 | <input type="checkbox"/><br>4  | <input type="checkbox"/><br>3 | <input type="checkbox"/><br>2 | <input type="checkbox"/><br>1 |
| PFB27    | Are you able to tie a knot or a bow?.....                       | <input type="checkbox"/><br>5 | <input type="checkbox"/><br>4  | <input type="checkbox"/><br>3 | <input type="checkbox"/><br>2 | <input type="checkbox"/><br>1 |
| PFB28r1* | Are you able to lift 10 pounds (5 kg) above your shoulder?..... | <input type="checkbox"/><br>5 | <input type="checkbox"/><br>4  | <input type="checkbox"/><br>3 | <input type="checkbox"/><br>2 | <input type="checkbox"/><br>1 |
| PFB29    | Are you able to lift a full cup or glass to your mouth?.....    | <input type="checkbox"/><br>5 | <input type="checkbox"/><br>4  | <input type="checkbox"/><br>3 | <input type="checkbox"/><br>2 | <input type="checkbox"/><br>1 |
| PFB30    | Are you able to open a new milk carton?.....                    | <input type="checkbox"/><br>5 | <input type="checkbox"/><br>4  | <input type="checkbox"/><br>3 | <input type="checkbox"/><br>2 | <input type="checkbox"/><br>1 |
| PFB31    | Are you able to open car doors?.....                            | <input type="checkbox"/><br>5 | <input type="checkbox"/><br>4  | <input type="checkbox"/><br>3 | <input type="checkbox"/><br>2 | <input type="checkbox"/><br>1 |
| PFB32    | Are you able to stand unsupported for 10 minutes?.....          | <input type="checkbox"/><br>5 | <input type="checkbox"/><br>4  | <input type="checkbox"/><br>3 | <input type="checkbox"/><br>2 | <input type="checkbox"/><br>1 |
| PFB33    | Are you able to remove something from your back pocket?.....    | <input type="checkbox"/><br>5 | <input type="checkbox"/><br>4  | <input type="checkbox"/><br>3 | <input type="checkbox"/><br>2 | <input type="checkbox"/><br>1 |

|         |                                                                                            | Without<br>any<br>difficulty  | With a<br>little<br>difficulty | With<br>some<br>difficulty    | With<br>much<br>difficulty    | Unable<br>to do               |
|---------|--------------------------------------------------------------------------------------------|-------------------------------|--------------------------------|-------------------------------|-------------------------------|-------------------------------|
| PFB34   | Are you able to change a light bulb overhead?.....                                         | <input type="checkbox"/><br>5 | <input type="checkbox"/><br>4  | <input type="checkbox"/><br>3 | <input type="checkbox"/><br>2 | <input type="checkbox"/><br>1 |
| PFB36   | Are you able to put on a pullover sweater?.....                                            | <input type="checkbox"/><br>5 | <input type="checkbox"/><br>4  | <input type="checkbox"/><br>3 | <input type="checkbox"/><br>2 | <input type="checkbox"/><br>1 |
| PFB37   | Are you able to turn faucets on and off?.....                                              | <input type="checkbox"/><br>5 | <input type="checkbox"/><br>4  | <input type="checkbox"/><br>3 | <input type="checkbox"/><br>2 | <input type="checkbox"/><br>1 |
| PFB39r1 | Are you able to reach and get down a 5 pound (2 kg) object from above your head?.....      | <input type="checkbox"/><br>5 | <input type="checkbox"/><br>4  | <input type="checkbox"/><br>3 | <input type="checkbox"/><br>2 | <input type="checkbox"/><br>1 |
| PFB40   | Are you able to stand up on tiptoes?.....                                                  | <input type="checkbox"/><br>5 | <input type="checkbox"/><br>4  | <input type="checkbox"/><br>3 | <input type="checkbox"/><br>2 | <input type="checkbox"/><br>1 |
| PFB41   | Are you able to trim your fingernails?.....                                                | <input type="checkbox"/><br>5 | <input type="checkbox"/><br>4  | <input type="checkbox"/><br>3 | <input type="checkbox"/><br>2 | <input type="checkbox"/><br>1 |
| PFB42   | Are you able to stand unsupported for 30 minutes?.....                                     | <input type="checkbox"/><br>5 | <input type="checkbox"/><br>4  | <input type="checkbox"/><br>3 | <input type="checkbox"/><br>2 | <input type="checkbox"/><br>1 |
| PFB56r1 | Are you able to lift one pound (0.5 kg) to shoulder level without bending your elbow?..... | <input type="checkbox"/><br>5 | <input type="checkbox"/><br>4  | <input type="checkbox"/><br>3 | <input type="checkbox"/><br>2 | <input type="checkbox"/><br>1 |

|         |                                                                               | Without<br>any<br>difficulty  | With a<br>little<br>difficulty | With<br>some<br>difficulty    | With<br>much<br>difficulty    | Unable<br>to do               |
|---------|-------------------------------------------------------------------------------|-------------------------------|--------------------------------|-------------------------------|-------------------------------|-------------------------------|
| PFB8r1  | Are you able to carry two bags filled with groceries 100 yards (100 m)? ..... | <input type="checkbox"/><br>5 | <input type="checkbox"/><br>4  | <input type="checkbox"/><br>3 | <input type="checkbox"/><br>2 | <input type="checkbox"/><br>1 |
| PFB9    | Are you able to jump up and down?.....                                        | <input type="checkbox"/><br>5 | <input type="checkbox"/><br>4  | <input type="checkbox"/><br>3 | <input type="checkbox"/><br>2 | <input type="checkbox"/><br>1 |
| PFC13r1 | Are you able to run 100 yards (100 m)?.....                                   | <input type="checkbox"/><br>5 | <input type="checkbox"/><br>4  | <input type="checkbox"/><br>3 | <input type="checkbox"/><br>2 | <input type="checkbox"/><br>1 |
| PFC29   | Are you able to walk up and down two steps? .....                             | <input type="checkbox"/><br>5 | <input type="checkbox"/><br>4  | <input type="checkbox"/><br>3 | <input type="checkbox"/><br>2 | <input type="checkbox"/><br>1 |
| PFC31   | Are you able to reach into a low cupboard?.....                               | <input type="checkbox"/><br>5 | <input type="checkbox"/><br>4  | <input type="checkbox"/><br>3 | <input type="checkbox"/><br>2 | <input type="checkbox"/><br>1 |
| PFC32   | Are you able to climb up 5 flights of stairs?.....                            | <input type="checkbox"/><br>5 | <input type="checkbox"/><br>4  | <input type="checkbox"/><br>3 | <input type="checkbox"/><br>2 | <input type="checkbox"/><br>1 |
| PFC33r1 | Are you able to run ten miles (16 km)?.....                                   | <input type="checkbox"/><br>5 | <input type="checkbox"/><br>4  | <input type="checkbox"/><br>3 | <input type="checkbox"/><br>2 | <input type="checkbox"/><br>1 |
| PFC38   | Are you able to walk at a normal speed?.....                                  | <input type="checkbox"/><br>5 | <input type="checkbox"/><br>4  | <input type="checkbox"/><br>3 | <input type="checkbox"/><br>2 | <input type="checkbox"/><br>1 |
| PFC39   | Are you able to stand without losing your balance for several minutes?.....   | <input type="checkbox"/><br>5 | <input type="checkbox"/><br>4  | <input type="checkbox"/><br>3 | <input type="checkbox"/><br>2 | <input type="checkbox"/><br>1 |
| PFC40   | Are you able to kneel on the floor?.....                                      | <input type="checkbox"/><br>5 | <input type="checkbox"/><br>4  | <input type="checkbox"/><br>3 | <input type="checkbox"/><br>2 | <input type="checkbox"/><br>1 |

|         |                                                                                                     | Without<br>any<br>difficulty  | With a<br>little<br>difficulty | With<br>some<br>difficulty    | With<br>much<br>difficulty    | Unable<br>to do               |
|---------|-----------------------------------------------------------------------------------------------------|-------------------------------|--------------------------------|-------------------------------|-------------------------------|-------------------------------|
| PFC41   | Are you able to sit down in and stand up from a low, soft couch?.....                               | <input type="checkbox"/><br>5 | <input type="checkbox"/><br>4  | <input type="checkbox"/><br>3 | <input type="checkbox"/><br>2 | <input type="checkbox"/><br>1 |
| PFC43   | Are you able to use your hands, such as for turning faucets, using kitchen gadgets, or sewing?..... | <input type="checkbox"/><br>5 | <input type="checkbox"/><br>4  | <input type="checkbox"/><br>3 | <input type="checkbox"/><br>2 | <input type="checkbox"/><br>1 |
| PFC45r1 | Are you able to sit on and get up from the toilet?.....                                             | <input type="checkbox"/><br>5 | <input type="checkbox"/><br>4  | <input type="checkbox"/><br>3 | <input type="checkbox"/><br>2 | <input type="checkbox"/><br>1 |
| PFC46   | Are you able to transfer from a bed to a chair and back?.....                                       | <input type="checkbox"/><br>5 | <input type="checkbox"/><br>4  | <input type="checkbox"/><br>3 | <input type="checkbox"/><br>2 | <input type="checkbox"/><br>1 |
| PFC47   | Are you able to be out of bed most of the day?.....                                                 | <input type="checkbox"/><br>5 | <input type="checkbox"/><br>4  | <input type="checkbox"/><br>3 | <input type="checkbox"/><br>2 | <input type="checkbox"/><br>1 |
| PFC49   | Are you able to water a house plant?.....                                                           | <input type="checkbox"/><br>5 | <input type="checkbox"/><br>4  | <input type="checkbox"/><br>3 | <input type="checkbox"/><br>2 | <input type="checkbox"/><br>1 |
| PFC51   | Are you able to wipe yourself after using the toilet?.....                                          | <input type="checkbox"/><br>5 | <input type="checkbox"/><br>4  | <input type="checkbox"/><br>3 | <input type="checkbox"/><br>2 | <input type="checkbox"/><br>1 |
| PFC52   | Are you able to turn from side to side in bed?.....                                                 | <input type="checkbox"/><br>5 | <input type="checkbox"/><br>4  | <input type="checkbox"/><br>3 | <input type="checkbox"/><br>2 | <input type="checkbox"/><br>1 |
| PFC53   | Are you able to get in and out of bed?.....                                                         | <input type="checkbox"/><br>5 | <input type="checkbox"/><br>4  | <input type="checkbox"/><br>3 | <input type="checkbox"/><br>2 | <input type="checkbox"/><br>1 |

|        |                                                                                                                                              | <b>Without<br/>any<br/>difficulty</b> | <b>With a<br/>little<br/>difficulty</b> | <b>With<br/>some<br/>difficulty</b> | <b>With<br/>much<br/>difficulty</b> | <b>Unable<br/>to do</b>       |
|--------|----------------------------------------------------------------------------------------------------------------------------------------------|---------------------------------------|-----------------------------------------|-------------------------------------|-------------------------------------|-------------------------------|
| PFC6r1 | Are you able to walk a block (100 m) on flat ground?.....                                                                                    | <input type="checkbox"/><br>5         | <input type="checkbox"/><br>4           | <input type="checkbox"/><br>3       | <input type="checkbox"/><br>2       | <input type="checkbox"/><br>1 |
| PFC7r1 | Are you able to run five miles (8 km)? .....                                                                                                 | <input type="checkbox"/><br>5         | <input type="checkbox"/><br>4           | <input type="checkbox"/><br>3       | <input type="checkbox"/><br>2       | <input type="checkbox"/><br>1 |
|        |                                                                                                                                              | <b>Not at all</b>                     | <b>Very little</b>                      | <b>Somewhat</b>                     | <b>Quite a lot</b>                  | <b>Cannot do</b>              |
| PFA1   | Does your health now limit you in doing vigorous activities, such as running, lifting heavy objects, participating in strenuous sports?..... | <input type="checkbox"/><br>5         | <input type="checkbox"/><br>4           | <input type="checkbox"/><br>3       | <input type="checkbox"/><br>2       | <input type="checkbox"/><br>1 |
| PFA3   | Does your health now limit you in bending, kneeling, or stooping? .....                                                                      | <input type="checkbox"/><br>5         | <input type="checkbox"/><br>4           | <input type="checkbox"/><br>3       | <input type="checkbox"/><br>2       | <input type="checkbox"/><br>1 |
| PFA4   | Does your health now limit you in doing heavy work around the house like scrubbing floors, or lifting or moving heavy furniture? .....       | <input type="checkbox"/><br>5         | <input type="checkbox"/><br>4           | <input type="checkbox"/><br>3       | <input type="checkbox"/><br>2       | <input type="checkbox"/><br>1 |
| PFA5   | Does your health now limit you in lifting or carrying groceries? .....                                                                       | <input type="checkbox"/><br>5         | <input type="checkbox"/><br>4           | <input type="checkbox"/><br>3       | <input type="checkbox"/><br>2       | <input type="checkbox"/><br>1 |
| PFA6*  | Does your health now limit you in bathing or dressing yourself?.....                                                                         | <input type="checkbox"/><br>5         | <input type="checkbox"/><br>4           | <input type="checkbox"/><br>3       | <input type="checkbox"/><br>2       | <input type="checkbox"/><br>1 |

|        |                                                                                                                                          | <b>Not at all</b>             | <b>Very little</b>            | <b>Somewhat</b>               | <b>Quite a lot</b>            | <b>Cannot do</b>              |
|--------|------------------------------------------------------------------------------------------------------------------------------------------|-------------------------------|-------------------------------|-------------------------------|-------------------------------|-------------------------------|
| PFB1   | Does your health now limit you in doing moderate work around the house like vacuuming, sweeping floors or carrying in groceries? .....   | <input type="checkbox"/><br>5 | <input type="checkbox"/><br>4 | <input type="checkbox"/><br>3 | <input type="checkbox"/><br>2 | <input type="checkbox"/><br>1 |
| PFB3*  | Does your health now limit you in putting a trash bag outside?.....                                                                      | <input type="checkbox"/><br>5 | <input type="checkbox"/><br>4 | <input type="checkbox"/><br>3 | <input type="checkbox"/><br>2 | <input type="checkbox"/><br>1 |
| PFB43  | Does your health now limit you in taking care of your personal needs (dress, comb hair, toilet, eat, bathe)? .....                       | <input type="checkbox"/><br>5 | <input type="checkbox"/><br>4 | <input type="checkbox"/><br>3 | <input type="checkbox"/><br>2 | <input type="checkbox"/><br>1 |
| PFB44* | Does your health now limit you in doing moderate activities, such as moving a table, pushing a vacuum cleaner, bowling, or playing golf? | <input type="checkbox"/><br>5 | <input type="checkbox"/><br>4 | <input type="checkbox"/><br>3 | <input type="checkbox"/><br>2 | <input type="checkbox"/><br>1 |
| PFB48  | Does your health now limit you in taking a shower?.....                                                                                  | <input type="checkbox"/><br>5 | <input type="checkbox"/><br>4 | <input type="checkbox"/><br>3 | <input type="checkbox"/><br>2 | <input type="checkbox"/><br>1 |
| PFB49  | Does your health now limit you in going for a short walk (less than 15 minutes)?.....                                                    | <input type="checkbox"/><br>5 | <input type="checkbox"/><br>4 | <input type="checkbox"/><br>3 | <input type="checkbox"/><br>2 | <input type="checkbox"/><br>1 |
| PFB5r1 | Does your health now limit you in hiking a couple of miles (3 km) on uneven surfaces, including hills? .....                             | <input type="checkbox"/><br>5 | <input type="checkbox"/><br>4 | <input type="checkbox"/><br>3 | <input type="checkbox"/><br>2 | <input type="checkbox"/><br>1 |
| PFB51  | Does your health now limit you in participating in active sports such as swimming, tennis, or basketball?.....                           | <input type="checkbox"/><br>5 | <input type="checkbox"/><br>4 | <input type="checkbox"/><br>3 | <input type="checkbox"/><br>2 | <input type="checkbox"/><br>1 |



|         |                                                                                                                                      | <b>Not at all</b>             | <b>Very little</b>            | <b>Somewhat</b>               | <b>Quite a lot</b>            | <b>Cannot do</b>              |
|---------|--------------------------------------------------------------------------------------------------------------------------------------|-------------------------------|-------------------------------|-------------------------------|-------------------------------|-------------------------------|
| PFB54   | Does your health now limit you in going OUTSIDE the home, for example to shop or visit a doctor's office?.....                       | <input type="checkbox"/><br>5 | <input type="checkbox"/><br>4 | <input type="checkbox"/><br>3 | <input type="checkbox"/><br>2 | <input type="checkbox"/><br>1 |
| PFB7    | Does your health now limit you in doing strenuous activities such as backpacking, skiing, playing tennis, bicycling or jogging?..... | <input type="checkbox"/><br>5 | <input type="checkbox"/><br>4 | <input type="checkbox"/><br>3 | <input type="checkbox"/><br>2 | <input type="checkbox"/><br>1 |
| PFC10   | Does your health now limit you in climbing several flights of stairs?.....                                                           | <input type="checkbox"/><br>5 | <input type="checkbox"/><br>4 | <input type="checkbox"/><br>3 | <input type="checkbox"/><br>2 | <input type="checkbox"/><br>1 |
| PFC12   | Does your health now limit you in doing two hours of physical labor?.....                                                            | <input type="checkbox"/><br>5 | <input type="checkbox"/><br>4 | <input type="checkbox"/><br>3 | <input type="checkbox"/><br>2 | <input type="checkbox"/><br>1 |
| PFC35   | Does your health now limit you in doing eight hours of physical labor?.....                                                          | <input type="checkbox"/><br>5 | <input type="checkbox"/><br>4 | <input type="checkbox"/><br>3 | <input type="checkbox"/><br>2 | <input type="checkbox"/><br>1 |
| PFC36r1 | Does your health now limit you in walking more than a mile (1.6 km)? .....                                                           | <input type="checkbox"/><br>5 | <input type="checkbox"/><br>4 | <input type="checkbox"/><br>3 | <input type="checkbox"/><br>2 | <input type="checkbox"/><br>1 |
| PFC37   | Does your health now limit you in climbing one flight of stairs?.....                                                                | <input type="checkbox"/><br>5 | <input type="checkbox"/><br>4 | <input type="checkbox"/><br>3 | <input type="checkbox"/><br>2 | <input type="checkbox"/><br>1 |
| PFC54   | Does your health now limit you in getting in and out of the bathtub?.....                                                            | <input type="checkbox"/><br>5 | <input type="checkbox"/><br>4 | <input type="checkbox"/><br>3 | <input type="checkbox"/><br>2 | <input type="checkbox"/><br>1 |

|       |                                                                                                    | <b>Not at all</b>             | <b>Very little</b>                | <b>Somewhat</b>               | <b>Quite a lot</b>            | <b>Cannot do</b>                  |
|-------|----------------------------------------------------------------------------------------------------|-------------------------------|-----------------------------------|-------------------------------|-------------------------------|-----------------------------------|
| PFC56 | Does your health now limit you in walking about the house?.....                                    | <input type="checkbox"/><br>5 | <input type="checkbox"/><br>4     | <input type="checkbox"/><br>3 | <input type="checkbox"/><br>2 | <input type="checkbox"/><br>1     |
|       |                                                                                                    | <b>No difficulty at all</b>   | <b>A little bit of difficulty</b> | <b>Some difficulty</b>        | <b>A lot of difficulty</b>    | <b>Can't do because of health</b> |
| PFB50 | How much difficulty do you have doing your daily physical activities, because of your health?..... | <input type="checkbox"/><br>5 | <input type="checkbox"/><br>4     | <input type="checkbox"/><br>3 | <input type="checkbox"/><br>2 | <input type="checkbox"/><br>1     |

## Appendix E

### **PROMIS Social Health**

In this study, CAT versions of the following two instruments were administered:

PROMIS Item Bank v. 1.0 –Satisfaction with Participation in Discretionary Social Activities

PROMIS Item Bank v. 1.0 –Satisfaction with Participation in Social Roles

However, these two item banks have now been merged into one and renamed as:

PROMIS Item Bank v2.0 - Satisfaction with Social Roles and Activities

In addition, a second major v2.0 Social Health bank was developed:

PROMIS Item Bank v2.0 - Ability to Participate in Social Roles and Activities

Unlike v1.0 banks, the v2.0 banks do not provide the context “In the past 7 days....”

### **Instruments included in this appendix:**

PROMIS SF v2.0 - Ability to Participate Social 8a

PROMIS SF v2.0 - Satisfaction Roles Activities 8a

PROMIS Item Bank v2.0 - Satisfaction with Social Roles and Activities

PROMIS Item Bank v2.0 - Ability to Participate in Social Roles and Activities

PROMIS Item Bank v. 1.0 –Satisfaction with Participation in Discretionary Social Activities

PROMIS Item Bank v. 1.0 –Satisfaction with Participation in Social Roles

We recommend the use of the two v2.0 short forms above. Users interested in CAT versions or for additional questions, please visit [www.assessmentcenter.net](http://www.assessmentcenter.net).

## Ability to Participate in Social Roles and Activities – Short Form 8a

Please respond to each item by marking one box per row.

|                   |                                                                                                  | Never                         | Rarely                        | Sometimes                     | Usually                       | Always                        |
|-------------------|--------------------------------------------------------------------------------------------------|-------------------------------|-------------------------------|-------------------------------|-------------------------------|-------------------------------|
| SRPPER11_<br>CaPS | I have trouble doing all of my regular leisure activities with others .....                      | <input type="checkbox"/><br>5 | <input type="checkbox"/><br>4 | <input type="checkbox"/><br>3 | <input type="checkbox"/><br>2 | <input type="checkbox"/><br>1 |
| SRPPER18_<br>CaPS | I have trouble doing all of the family activities that I want to do.....                         | <input type="checkbox"/><br>5 | <input type="checkbox"/><br>4 | <input type="checkbox"/><br>3 | <input type="checkbox"/><br>2 | <input type="checkbox"/><br>1 |
| SRPPER23_<br>CaPS | I have trouble doing all of my usual work (include work at home) .....                           | <input type="checkbox"/><br>5 | <input type="checkbox"/><br>4 | <input type="checkbox"/><br>3 | <input type="checkbox"/><br>2 | <input type="checkbox"/><br>1 |
| SRPPER46_<br>CaPS | I have trouble doing all of the activities with friends that I want to do .....                  | <input type="checkbox"/><br>5 | <input type="checkbox"/><br>4 | <input type="checkbox"/><br>3 | <input type="checkbox"/><br>2 | <input type="checkbox"/><br>1 |
| SRPPER15_<br>CaPS | I have to limit the things I do for fun with others.....                                         | <input type="checkbox"/><br>5 | <input type="checkbox"/><br>4 | <input type="checkbox"/><br>3 | <input type="checkbox"/><br>2 | <input type="checkbox"/><br>1 |
| SRPPER28r1        | I have to limit my regular activities with friends .....                                         | <input type="checkbox"/><br>5 | <input type="checkbox"/><br>4 | <input type="checkbox"/><br>3 | <input type="checkbox"/><br>2 | <input type="checkbox"/><br>1 |
| SRPPER14r1        | I have to limit my regular family activities .....                                               | <input type="checkbox"/><br>5 | <input type="checkbox"/><br>4 | <input type="checkbox"/><br>3 | <input type="checkbox"/><br>2 | <input type="checkbox"/><br>1 |
| SRPPER26_<br>CaPS | I have trouble doing all of the work that is really important to me (include work at home) ..... | <input type="checkbox"/><br>5 | <input type="checkbox"/><br>4 | <input type="checkbox"/><br>3 | <input type="checkbox"/><br>2 | <input type="checkbox"/><br>1 |

## Satisfaction with Social Roles and Activities – Short Form 8a

Please respond to each item by marking one box per row.

|               |                                                                                                           | Not at all                    | A little bit                  | Somewhat                      | Quite a bit                   | Very much                     |
|---------------|-----------------------------------------------------------------------------------------------------------|-------------------------------|-------------------------------|-------------------------------|-------------------------------|-------------------------------|
| SRPSAT06r1    | I am satisfied with my ability to do things for my family .....                                           | <input type="checkbox"/><br>1 | <input type="checkbox"/><br>2 | <input type="checkbox"/><br>3 | <input type="checkbox"/><br>4 | <input type="checkbox"/><br>5 |
| SRPSAT33_CaPS | I am satisfied with my ability to do things for fun with others.....                                      | <input type="checkbox"/><br>1 | <input type="checkbox"/><br>2 | <input type="checkbox"/><br>3 | <input type="checkbox"/><br>4 | <input type="checkbox"/><br>5 |
| SRPSAT34r1    | I feel good about my ability to do things for my friends.....                                             | <input type="checkbox"/><br>1 | <input type="checkbox"/><br>2 | <input type="checkbox"/><br>3 | <input type="checkbox"/><br>4 | <input type="checkbox"/><br>5 |
| SRPSAT49r1    | I am satisfied with my ability to perform my daily routines .....                                         | <input type="checkbox"/><br>1 | <input type="checkbox"/><br>2 | <input type="checkbox"/><br>3 | <input type="checkbox"/><br>4 | <input type="checkbox"/><br>5 |
| SRPSAT33r1    | I am satisfied with my ability to do things for fun outside my home .....                                 | <input type="checkbox"/><br>1 | <input type="checkbox"/><br>2 | <input type="checkbox"/><br>3 | <input type="checkbox"/><br>4 | <input type="checkbox"/><br>5 |
| SRPSAT46_CaPS | I am satisfied with my ability to meet the needs of my friends.....                                       | <input type="checkbox"/><br>1 | <input type="checkbox"/><br>2 | <input type="checkbox"/><br>3 | <input type="checkbox"/><br>4 | <input type="checkbox"/><br>5 |
| SRPSAT09r1    | I am satisfied with my ability to do the work that is really important to me (include work at home) ..... | <input type="checkbox"/><br>1 | <input type="checkbox"/><br>2 | <input type="checkbox"/><br>3 | <input type="checkbox"/><br>4 | <input type="checkbox"/><br>5 |
| SRPSAT45_CaPS | I am satisfied with my ability to meet the needs of my family .....                                       | <input type="checkbox"/><br>1 | <input type="checkbox"/><br>2 | <input type="checkbox"/><br>3 | <input type="checkbox"/><br>4 | <input type="checkbox"/><br>5 |

## Ability to Participate in Social Roles and Activities – Calibrated Items

Please respond to each item by marking one box per row.

|               |                                                                                    | Never                         | Rarely                        | Sometimes                     | Usually                       | Always                        |
|---------------|------------------------------------------------------------------------------------|-------------------------------|-------------------------------|-------------------------------|-------------------------------|-------------------------------|
| RP1           | I have trouble doing my regular daily work around the house .....                  | <input type="checkbox"/><br>5 | <input type="checkbox"/><br>4 | <input type="checkbox"/><br>3 | <input type="checkbox"/><br>2 | <input type="checkbox"/><br>1 |
| RP6           | I have trouble meeting the needs of my friends .....                               | <input type="checkbox"/><br>5 | <input type="checkbox"/><br>4 | <input type="checkbox"/><br>3 | <input type="checkbox"/><br>2 | <input type="checkbox"/><br>1 |
| SRPPER_CaPS1  | I have to limit social activities at home ..                                       | <input type="checkbox"/><br>5 | <input type="checkbox"/><br>4 | <input type="checkbox"/><br>3 | <input type="checkbox"/><br>2 | <input type="checkbox"/><br>1 |
| SRPPER01_r1   | I have trouble meeting the needs of my family .....                                | <input type="checkbox"/><br>5 | <input type="checkbox"/><br>4 | <input type="checkbox"/><br>3 | <input type="checkbox"/><br>2 | <input type="checkbox"/><br>1 |
| SRPPER02_r1   | I am limited in doing my work (include work at home) .....                         | <input type="checkbox"/><br>5 | <input type="checkbox"/><br>4 | <input type="checkbox"/><br>3 | <input type="checkbox"/><br>2 | <input type="checkbox"/><br>1 |
| SRPPER03_r1   | I have to limit social activities outside my home .....                            | <input type="checkbox"/><br>5 | <input type="checkbox"/><br>4 | <input type="checkbox"/><br>3 | <input type="checkbox"/><br>2 | <input type="checkbox"/><br>1 |
| SRPPER04_CaPS | I have trouble participating in recreational activities with others .....          | <input type="checkbox"/><br>5 | <input type="checkbox"/><br>4 | <input type="checkbox"/><br>3 | <input type="checkbox"/><br>2 | <input type="checkbox"/><br>1 |
| SRPPER05_CaPS | I have trouble doing everything for my family that I feel I should do.....         | <input type="checkbox"/><br>5 | <input type="checkbox"/><br>4 | <input type="checkbox"/><br>3 | <input type="checkbox"/><br>2 | <input type="checkbox"/><br>1 |
| SRPPER06_CaPS | I have trouble accomplishing my usual work (include work at home).....             | <input type="checkbox"/><br>5 | <input type="checkbox"/><br>4 | <input type="checkbox"/><br>3 | <input type="checkbox"/><br>2 | <input type="checkbox"/><br>1 |
| SRPPER07_CaPS | I have trouble doing all of the family activities that I feel I should do.....     | <input type="checkbox"/><br>5 | <input type="checkbox"/><br>4 | <input type="checkbox"/><br>3 | <input type="checkbox"/><br>2 | <input type="checkbox"/><br>1 |
| SRPPER08_CaPS | I have trouble doing all of the family activities that are really important to me. | <input type="checkbox"/><br>5 | <input type="checkbox"/><br>4 | <input type="checkbox"/><br>3 | <input type="checkbox"/><br>2 | <input type="checkbox"/><br>1 |
| SRPPER09_CaPS | I have trouble doing everything for work that I want to do (include work at home). | <input type="checkbox"/><br>5 | <input type="checkbox"/><br>4 | <input type="checkbox"/><br>3 | <input type="checkbox"/><br>2 | <input type="checkbox"/><br>1 |

PROMIS Item Bank v2.0 - Ability to Participate in Social Roles and Activities

|                   |                                                                                                  | Never                         | Rarely                        | Sometimes                     | Usually                       | Always                        |
|-------------------|--------------------------------------------------------------------------------------------------|-------------------------------|-------------------------------|-------------------------------|-------------------------------|-------------------------------|
| SRPPER11<br>_CaPS | I have trouble doing all of my regular leisure activities with others .....                      | <input type="checkbox"/><br>5 | <input type="checkbox"/><br>4 | <input type="checkbox"/><br>3 | <input type="checkbox"/><br>2 | <input type="checkbox"/><br>1 |
| SRPPER13<br>_CaPS | I have to limit social activities with groups of people.....                                     | <input type="checkbox"/><br>5 | <input type="checkbox"/><br>4 | <input type="checkbox"/><br>3 | <input type="checkbox"/><br>2 | <input type="checkbox"/><br>1 |
| SRPPER14<br>r1    | I have to limit my regular family activities .....                                               | <input type="checkbox"/><br>5 | <input type="checkbox"/><br>4 | <input type="checkbox"/><br>3 | <input type="checkbox"/><br>2 | <input type="checkbox"/><br>1 |
| SRPPER15<br>_CaPS | I have to limit the things I do for fun with others.....                                         | <input type="checkbox"/><br>5 | <input type="checkbox"/><br>4 | <input type="checkbox"/><br>3 | <input type="checkbox"/><br>2 | <input type="checkbox"/><br>1 |
| SRPPER16<br>r1    | I have to do my work for shorter periods of time than usual (include work at home) .....         | <input type="checkbox"/><br>5 | <input type="checkbox"/><br>4 | <input type="checkbox"/><br>3 | <input type="checkbox"/><br>2 | <input type="checkbox"/><br>1 |
| SRPPER17<br>r1    | I feel limited in the amount of time I have for my family.....                                   | <input type="checkbox"/><br>5 | <input type="checkbox"/><br>4 | <input type="checkbox"/><br>3 | <input type="checkbox"/><br>2 | <input type="checkbox"/><br>1 |
| SRPPER18<br>_CaPS | I have trouble doing all of the family activities that I want to do.....                         | <input type="checkbox"/><br>5 | <input type="checkbox"/><br>4 | <input type="checkbox"/><br>3 | <input type="checkbox"/><br>2 | <input type="checkbox"/><br>1 |
| SRPPER20<br>_CaPS | I have trouble doing all of the activities with friends that are really important to me.....     | <input type="checkbox"/><br>5 | <input type="checkbox"/><br>4 | <input type="checkbox"/><br>3 | <input type="checkbox"/><br>2 | <input type="checkbox"/><br>1 |
| SRPPER21<br>_CaPS | I have trouble doing all the leisure activities with others that I want to do .....              | <input type="checkbox"/><br>5 | <input type="checkbox"/><br>4 | <input type="checkbox"/><br>3 | <input type="checkbox"/><br>2 | <input type="checkbox"/><br>1 |
| SRPPER22<br>_CaPS | I have trouble keeping up with my family responsibilities.....                                   | <input type="checkbox"/><br>5 | <input type="checkbox"/><br>4 | <input type="checkbox"/><br>3 | <input type="checkbox"/><br>2 | <input type="checkbox"/><br>1 |
| SRPPER23<br>_CaPS | I have trouble doing all of my usual work (include work at home) .....                           | <input type="checkbox"/><br>5 | <input type="checkbox"/><br>4 | <input type="checkbox"/><br>3 | <input type="checkbox"/><br>2 | <input type="checkbox"/><br>1 |
| SRPPER26<br>_CaPS | I have trouble doing all of the work that is really important to me (include work at home) ..... | <input type="checkbox"/><br>5 | <input type="checkbox"/><br>4 | <input type="checkbox"/><br>3 | <input type="checkbox"/><br>2 | <input type="checkbox"/><br>1 |
| SRPPER28<br>r1    | I have to limit my regular activities with friends .....                                         | <input type="checkbox"/><br>5 | <input type="checkbox"/><br>4 | <input type="checkbox"/><br>3 | <input type="checkbox"/><br>2 | <input type="checkbox"/><br>1 |

PROMIS Item Bank v2.0 - Ability to Participate in Social Roles and Activities

|                   |                                                                                        | Never                         | Rarely                        | Sometimes                     | Usually                       | Always                        |
|-------------------|----------------------------------------------------------------------------------------|-------------------------------|-------------------------------|-------------------------------|-------------------------------|-------------------------------|
| SRPPER31<br>_CaPS | I have trouble taking care of my regular personal responsibilities.....                | <input type="checkbox"/><br>5 | <input type="checkbox"/><br>4 | <input type="checkbox"/><br>3 | <input type="checkbox"/><br>2 | <input type="checkbox"/><br>1 |
| SRPPER35<br>_CaPS | I have trouble doing everything for my friends that I want to do .....                 | <input type="checkbox"/><br>5 | <input type="checkbox"/><br>4 | <input type="checkbox"/><br>3 | <input type="checkbox"/><br>2 | <input type="checkbox"/><br>1 |
| SRPPER36<br>_CaPS | I have trouble doing all of the activities with friends that I feel I should do .....  | <input type="checkbox"/><br>5 | <input type="checkbox"/><br>4 | <input type="checkbox"/><br>3 | <input type="checkbox"/><br>2 | <input type="checkbox"/><br>1 |
| SRPPER37<br>_CaPS | I have trouble doing all of the work that I feel I should do (include work at home)... | <input type="checkbox"/><br>5 | <input type="checkbox"/><br>4 | <input type="checkbox"/><br>3 | <input type="checkbox"/><br>2 | <input type="checkbox"/><br>1 |
| SRPPER42<br>r1    | I feel limited in my ability to visit friends .....                                    | <input type="checkbox"/><br>5 | <input type="checkbox"/><br>4 | <input type="checkbox"/><br>3 | <input type="checkbox"/><br>2 | <input type="checkbox"/><br>1 |
| SRPPER43<br>r1    | I have trouble keeping in touch with others.....                                       | <input type="checkbox"/><br>5 | <input type="checkbox"/><br>4 | <input type="checkbox"/><br>3 | <input type="checkbox"/><br>2 | <input type="checkbox"/><br>1 |
| SRPPER46<br>_CaPS | I have trouble doing all of the activities with friends that I want to do .....        | <input type="checkbox"/><br>5 | <input type="checkbox"/><br>4 | <input type="checkbox"/><br>3 | <input type="checkbox"/><br>2 | <input type="checkbox"/><br>1 |
| SRPPER47<br>_CaPS | I have trouble keeping up with my work responsibilities (include work at home)....     | <input type="checkbox"/><br>5 | <input type="checkbox"/><br>4 | <input type="checkbox"/><br>3 | <input type="checkbox"/><br>2 | <input type="checkbox"/><br>1 |
| SRPPER54<br>_CaPS | I have trouble doing everything for my friends that I feel I should do .....           | <input type="checkbox"/><br>5 | <input type="checkbox"/><br>4 | <input type="checkbox"/><br>3 | <input type="checkbox"/><br>2 | <input type="checkbox"/><br>1 |
| SRPPER55<br>r1    | I feel limited in the amount of time I have to visit friends.....                      | <input type="checkbox"/><br>5 | <input type="checkbox"/><br>4 | <input type="checkbox"/><br>3 | <input type="checkbox"/><br>2 | <input type="checkbox"/><br>1 |



### Satisfaction with Social Roles and Activities – Calibrated Items

Please respond to each item by marking one box per row.

|               |                                                                                                           | <b>Not at all</b>             | <b>A little bit</b>           | <b>Somewhat</b>               | <b>Quite a bit</b>            | <b>Very much</b>              |
|---------------|-----------------------------------------------------------------------------------------------------------|-------------------------------|-------------------------------|-------------------------------|-------------------------------|-------------------------------|
| SRPSAT17_CaPS | I am satisfied with the extent of my social activities outside my home .....                              | <input type="checkbox"/><br>1 | <input type="checkbox"/><br>2 | <input type="checkbox"/><br>3 | <input type="checkbox"/><br>4 | <input type="checkbox"/><br>5 |
| RP14_CaPS     | I am satisfied with my current level of family activities.....                                            | <input type="checkbox"/><br>1 | <input type="checkbox"/><br>2 | <input type="checkbox"/><br>3 | <input type="checkbox"/><br>4 | <input type="checkbox"/><br>5 |
| RP7_CaPS      | I am satisfied with my ability to maintain friendships.....                                               | <input type="checkbox"/><br>1 | <input type="checkbox"/><br>2 | <input type="checkbox"/><br>3 | <input type="checkbox"/><br>4 | <input type="checkbox"/><br>5 |
| SRPSAT03_CaPS | I am satisfied with how often I go out for entertainment .....                                            | <input type="checkbox"/><br>1 | <input type="checkbox"/><br>2 | <input type="checkbox"/><br>3 | <input type="checkbox"/><br>4 | <input type="checkbox"/><br>5 |
| SRPSAT04_CaPS | I am satisfied with my ability to socialize with friends .....                                            | <input type="checkbox"/><br>1 | <input type="checkbox"/><br>2 | <input type="checkbox"/><br>3 | <input type="checkbox"/><br>4 | <input type="checkbox"/><br>5 |
| SRPSAT05r1    | I am satisfied with the amount of time I spend doing leisure activities .....                             | <input type="checkbox"/><br>1 | <input type="checkbox"/><br>2 | <input type="checkbox"/><br>3 | <input type="checkbox"/><br>4 | <input type="checkbox"/><br>5 |
| SRPSAT05_CaPS | I am satisfied with the amount of time I spend doing leisure activities with others                       | <input type="checkbox"/><br>1 | <input type="checkbox"/><br>2 | <input type="checkbox"/><br>3 | <input type="checkbox"/><br>4 | <input type="checkbox"/><br>5 |
| SRPSAT06r1    | I am satisfied with my ability to do things for my family .....                                           | <input type="checkbox"/><br>1 | <input type="checkbox"/><br>2 | <input type="checkbox"/><br>3 | <input type="checkbox"/><br>4 | <input type="checkbox"/><br>5 |
| SRPSAT07r1    | I am satisfied with how much work I can do (include work at home).....                                    | <input type="checkbox"/><br>1 | <input type="checkbox"/><br>2 | <input type="checkbox"/><br>3 | <input type="checkbox"/><br>4 | <input type="checkbox"/><br>5 |
| SRPSAT08r1    | I feel good about my ability to do things for my family .....                                             | <input type="checkbox"/><br>1 | <input type="checkbox"/><br>2 | <input type="checkbox"/><br>3 | <input type="checkbox"/><br>4 | <input type="checkbox"/><br>5 |
| SRPSAT09r1    | I am satisfied with my ability to do the work that is really important to me (include work at home) ..... | <input type="checkbox"/><br>1 | <input type="checkbox"/><br>2 | <input type="checkbox"/><br>3 | <input type="checkbox"/><br>4 | <input type="checkbox"/><br>5 |
| SRPSAT10r1    | I am satisfied with my current level of social activity .....                                             | <input type="checkbox"/><br>1 | <input type="checkbox"/><br>2 | <input type="checkbox"/><br>3 | <input type="checkbox"/><br>4 | <input type="checkbox"/><br>5 |

PROMIS Item Bank v2.0 - Satisfaction with Social Roles and Activities

|                   |                                                                                                            | <b>Not at all</b>             | <b>A little bit</b>           | <b>Somewhat</b>               | <b>Quite a bit</b>            | <b>Very much</b>              |
|-------------------|------------------------------------------------------------------------------------------------------------|-------------------------------|-------------------------------|-------------------------------|-------------------------------|-------------------------------|
| SRPSAT15_<br>CaPS | I am satisfied with my ability to participate in family activities.....                                    | <input type="checkbox"/><br>1 | <input type="checkbox"/><br>2 | <input type="checkbox"/><br>3 | <input type="checkbox"/><br>4 | <input type="checkbox"/><br>5 |
| SRPSAT19r1        | I am satisfied with my ability to do all of the community activities that are really important to me ..... | <input type="checkbox"/><br>1 | <input type="checkbox"/><br>2 | <input type="checkbox"/><br>3 | <input type="checkbox"/><br>4 | <input type="checkbox"/><br>5 |
| SRPSAT20r1        | I am satisfied with my ability to do things for my friends.....                                            | <input type="checkbox"/><br>1 | <input type="checkbox"/><br>2 | <input type="checkbox"/><br>3 | <input type="checkbox"/><br>4 | <input type="checkbox"/><br>5 |
| SRPSAT21r1        | I am satisfied with the amount of time I spend doing work (include work at home) .....                     | <input type="checkbox"/><br>1 | <input type="checkbox"/><br>2 | <input type="checkbox"/><br>3 | <input type="checkbox"/><br>4 | <input type="checkbox"/><br>5 |
| SRPSAT22r1        | I am happy with how much I do for my family .....                                                          | <input type="checkbox"/><br>1 | <input type="checkbox"/><br>2 | <input type="checkbox"/><br>3 | <input type="checkbox"/><br>4 | <input type="checkbox"/><br>5 |
| SRPSAT23r1        | I am satisfied with my ability to do leisure activities .....                                              | <input type="checkbox"/><br>1 | <input type="checkbox"/><br>2 | <input type="checkbox"/><br>3 | <input type="checkbox"/><br>4 | <input type="checkbox"/><br>5 |
| SRPSAT23_<br>CaPS | I am satisfied with my ability to do leisure activities with others .....                                  | <input type="checkbox"/><br>1 | <input type="checkbox"/><br>2 | <input type="checkbox"/><br>3 | <input type="checkbox"/><br>4 | <input type="checkbox"/><br>5 |
| SRPSAT24r1        | I am satisfied with my ability to work (include work at home) .....                                        | <input type="checkbox"/><br>1 | <input type="checkbox"/><br>2 | <input type="checkbox"/><br>3 | <input type="checkbox"/><br>4 | <input type="checkbox"/><br>5 |
| SRPSAT25r1        | I am satisfied with my current level of activities with my friends.....                                    | <input type="checkbox"/><br>1 | <input type="checkbox"/><br>2 | <input type="checkbox"/><br>3 | <input type="checkbox"/><br>4 | <input type="checkbox"/><br>5 |
| SRPSAT29_<br>CaPS | I am satisfied with my ability to engage in activities with friends.....                                   | <input type="checkbox"/><br>1 | <input type="checkbox"/><br>2 | <input type="checkbox"/><br>3 | <input type="checkbox"/><br>4 | <input type="checkbox"/><br>5 |
| SRPSAT33r1        | I am satisfied with my ability to do things for fun outside my home .....                                  | <input type="checkbox"/><br>1 | <input type="checkbox"/><br>2 | <input type="checkbox"/><br>3 | <input type="checkbox"/><br>4 | <input type="checkbox"/><br>5 |
| SRPSAT33_<br>CaPS | I am satisfied with my ability to do things for fun with others.....                                       | <input type="checkbox"/><br>1 | <input type="checkbox"/><br>2 | <input type="checkbox"/><br>3 | <input type="checkbox"/><br>4 | <input type="checkbox"/><br>5 |
| SRPSAT34r1        | I feel good about my ability to do things for my friends.....                                              | <input type="checkbox"/><br>1 | <input type="checkbox"/><br>2 | <input type="checkbox"/><br>3 | <input type="checkbox"/><br>4 | <input type="checkbox"/><br>5 |

PROMIS Item Bank v2.0 - Satisfaction with Social Roles and Activities

|               |                                                                                                            | Not at all                    | A little bit                  | Somewhat                      | Quite a bit                   | Very much                     |
|---------------|------------------------------------------------------------------------------------------------------------|-------------------------------|-------------------------------|-------------------------------|-------------------------------|-------------------------------|
| SRPSAT35r1    | The quality of my work is as good as I want it to be (include work at home) .....                          | <input type="checkbox"/><br>1 | <input type="checkbox"/><br>2 | <input type="checkbox"/><br>3 | <input type="checkbox"/><br>4 | <input type="checkbox"/><br>5 |
| SRPSAT36r1    | I am happy with how much I do for my friends .....                                                         | <input type="checkbox"/><br>1 | <input type="checkbox"/><br>2 | <input type="checkbox"/><br>3 | <input type="checkbox"/><br>4 | <input type="checkbox"/><br>5 |
| SRPSAT37r1    | I am satisfied with the amount of time I spend visiting friends .....                                      | <input type="checkbox"/><br>1 | <input type="checkbox"/><br>2 | <input type="checkbox"/><br>3 | <input type="checkbox"/><br>4 | <input type="checkbox"/><br>5 |
| SRPSAT38r1    | I am satisfied with the amount of time I spend performing my daily routines .....                          | <input type="checkbox"/><br>1 | <input type="checkbox"/><br>2 | <input type="checkbox"/><br>3 | <input type="checkbox"/><br>4 | <input type="checkbox"/><br>5 |
| SRPSAT38_CaPS | I am satisfied with the amount of time I spend doing things for my family .....                            | <input type="checkbox"/><br>1 | <input type="checkbox"/><br>2 | <input type="checkbox"/><br>3 | <input type="checkbox"/><br>4 | <input type="checkbox"/><br>5 |
| SRPSAT39r1    | I am satisfied with my ability to do household chores/tasks .....                                          | <input type="checkbox"/><br>1 | <input type="checkbox"/><br>2 | <input type="checkbox"/><br>3 | <input type="checkbox"/><br>4 | <input type="checkbox"/><br>5 |
| SRPSAT41_CaPS | I am satisfied with the extent of my social activities with groups of people....                           | <input type="checkbox"/><br>1 | <input type="checkbox"/><br>2 | <input type="checkbox"/><br>3 | <input type="checkbox"/><br>4 | <input type="checkbox"/><br>5 |
| SRPSAT43_CaPS | I am satisfied with my ability to keep in touch with others.....                                           | <input type="checkbox"/><br>1 | <input type="checkbox"/><br>2 | <input type="checkbox"/><br>3 | <input type="checkbox"/><br>4 | <input type="checkbox"/><br>5 |
| SRPSAT45_CaPS | I am satisfied with my ability to meet the needs of my family .....                                        | <input type="checkbox"/><br>1 | <input type="checkbox"/><br>2 | <input type="checkbox"/><br>3 | <input type="checkbox"/><br>4 | <input type="checkbox"/><br>5 |
| SRPSAT46_CaPS | I am satisfied with my ability to meet the needs of my friends.....                                        | <input type="checkbox"/><br>1 | <input type="checkbox"/><br>2 | <input type="checkbox"/><br>3 | <input type="checkbox"/><br>4 | <input type="checkbox"/><br>5 |
| SRPSAT47r1    | I am satisfied with my ability to do regular personal and household responsibilities .....                 | <input type="checkbox"/><br>1 | <input type="checkbox"/><br>2 | <input type="checkbox"/><br>3 | <input type="checkbox"/><br>4 | <input type="checkbox"/><br>5 |
| SRPSAT47_CaPS | I am satisfied with my ability to do regular personal responsibilities .....                               | <input type="checkbox"/><br>1 | <input type="checkbox"/><br>2 | <input type="checkbox"/><br>3 | <input type="checkbox"/><br>4 | <input type="checkbox"/><br>5 |
| SRPSAT48r1    | I am satisfied with my ability to do things for fun at home (like reading, listening to music, etc.) ..... | <input type="checkbox"/><br>1 | <input type="checkbox"/><br>2 | <input type="checkbox"/><br>3 | <input type="checkbox"/><br>4 | <input type="checkbox"/><br>5 |

**PROMIS Item Bank v2.0 - Satisfaction with Social Roles and Activities**

|                   |                                                                                                          | <b>Not at all</b>             | <b>A little bit</b>           | <b>Somewhat</b>               | <b>Quite a bit</b>            | <b>Very much</b>              |
|-------------------|----------------------------------------------------------------------------------------------------------|-------------------------------|-------------------------------|-------------------------------|-------------------------------|-------------------------------|
| SRPSAT49r1        | I am satisfied with my ability to perform my daily routines .....                                        | <input type="checkbox"/><br>1 | <input type="checkbox"/><br>2 | <input type="checkbox"/><br>3 | <input type="checkbox"/><br>4 | <input type="checkbox"/><br>5 |
| SRPSAT50r1        | I am satisfied with my ability to meet the needs of those who depend on me .....                         | <input type="checkbox"/><br>1 | <input type="checkbox"/><br>2 | <input type="checkbox"/><br>3 | <input type="checkbox"/><br>4 | <input type="checkbox"/><br>5 |
| SRPSAT51r1        | I am satisfied with my ability to run errands .....                                                      | <input type="checkbox"/><br>1 | <input type="checkbox"/><br>2 | <input type="checkbox"/><br>3 | <input type="checkbox"/><br>4 | <input type="checkbox"/><br>5 |
| SRPSAT51_<br>CaPS | I am satisfied with my ability to run errands for others .....                                           | <input type="checkbox"/><br>1 | <input type="checkbox"/><br>2 | <input type="checkbox"/><br>3 | <input type="checkbox"/><br>4 | <input type="checkbox"/><br>5 |
| SRPSAT52r1        | I am satisfied with my ability to do all of the leisure activities that are really important to me ..... | <input type="checkbox"/><br>1 | <input type="checkbox"/><br>2 | <input type="checkbox"/><br>3 | <input type="checkbox"/><br>4 | <input type="checkbox"/><br>5 |
| SRPSAT52_<br>CaPS | I am satisfied with my ability to do all of the group activities that are really important to me .....   | <input type="checkbox"/><br>1 | <input type="checkbox"/><br>2 | <input type="checkbox"/><br>3 | <input type="checkbox"/><br>4 | <input type="checkbox"/><br>5 |

## Satisfaction with Participation in Discretionary Social Activities – Calibrated Items

Please respond to each item by marking one box per row.

In the past 7 days...

|          |                                                                                                            | <b>Not at all</b>             | <b>A little bit</b>           | <b>Somewhat</b>               | <b>Quite a bit</b>            | <b>Very much</b>              |
|----------|------------------------------------------------------------------------------------------------------------|-------------------------------|-------------------------------|-------------------------------|-------------------------------|-------------------------------|
| SRPSAT05 | I am satisfied with the amount of time I spend doing leisure activities.....                               | <input type="checkbox"/><br>1 | <input type="checkbox"/><br>2 | <input type="checkbox"/><br>3 | <input type="checkbox"/><br>4 | <input type="checkbox"/><br>5 |
| SRPSAT10 | I am satisfied with my current level of social activity.....                                               | <input type="checkbox"/><br>1 | <input type="checkbox"/><br>2 | <input type="checkbox"/><br>3 | <input type="checkbox"/><br>4 | <input type="checkbox"/><br>5 |
| SRPSAT19 | I am satisfied with my ability to do all of the community activities that are really important to me ..... | <input type="checkbox"/><br>1 | <input type="checkbox"/><br>2 | <input type="checkbox"/><br>3 | <input type="checkbox"/><br>4 | <input type="checkbox"/><br>5 |
| SRPSAT20 | I am satisfied with my ability to do things for my friends.....                                            | <input type="checkbox"/><br>1 | <input type="checkbox"/><br>2 | <input type="checkbox"/><br>3 | <input type="checkbox"/><br>4 | <input type="checkbox"/><br>5 |
| SRPSAT23 | I am satisfied with my ability to do leisure activities.....                                               | <input type="checkbox"/><br>1 | <input type="checkbox"/><br>2 | <input type="checkbox"/><br>3 | <input type="checkbox"/><br>4 | <input type="checkbox"/><br>5 |
| SRPSAT25 | I am satisfied with my current level of activities with my friends.....                                    | <input type="checkbox"/><br>1 | <input type="checkbox"/><br>2 | <input type="checkbox"/><br>3 | <input type="checkbox"/><br>4 | <input type="checkbox"/><br>5 |
| SRPSAT33 | I am satisfied with my ability to do things for fun outside my home.....                                   | <input type="checkbox"/><br>1 | <input type="checkbox"/><br>2 | <input type="checkbox"/><br>3 | <input type="checkbox"/><br>4 | <input type="checkbox"/><br>5 |

**In the past 7 days...**

|          |                                                                                                            | <b>Not at all</b>             | <b>A little bit</b>           | <b>Somewhat</b>               | <b>Quite a bit</b>            | <b>Very much</b>              |
|----------|------------------------------------------------------------------------------------------------------------|-------------------------------|-------------------------------|-------------------------------|-------------------------------|-------------------------------|
| SRPSAT34 | I feel good about my ability to do things for my friends.....                                              | <input type="checkbox"/><br>1 | <input type="checkbox"/><br>2 | <input type="checkbox"/><br>3 | <input type="checkbox"/><br>4 | <input type="checkbox"/><br>5 |
| SRPSAT36 | I am happy with how much I do for my friends.....                                                          | <input type="checkbox"/><br>1 | <input type="checkbox"/><br>2 | <input type="checkbox"/><br>3 | <input type="checkbox"/><br>4 | <input type="checkbox"/><br>5 |
| SRPSAT37 | I am satisfied with the amount of time I spend visiting friends.....                                       | <input type="checkbox"/><br>1 | <input type="checkbox"/><br>2 | <input type="checkbox"/><br>3 | <input type="checkbox"/><br>4 | <input type="checkbox"/><br>5 |
| SRPSAT48 | I am satisfied with my ability to do things for fun at home (like reading, listening to music, etc.) ..... | <input type="checkbox"/><br>1 | <input type="checkbox"/><br>2 | <input type="checkbox"/><br>3 | <input type="checkbox"/><br>4 | <input type="checkbox"/><br>5 |
| SRPSAT52 | I am satisfied with my ability to do all of the leisure activities that are really important to me.....    | <input type="checkbox"/><br>1 | <input type="checkbox"/><br>2 | <input type="checkbox"/><br>3 | <input type="checkbox"/><br>4 | <input type="checkbox"/><br>5 |

## Satisfaction with Participation in Social Roles – Calibrated Items

Please respond to each item by marking one box per row.

In the past 7 days...

|          |                                                                                                          | Not at all                    | A little bit                  | Somewhat                      | Quite a bit                   | Very much                     |
|----------|----------------------------------------------------------------------------------------------------------|-------------------------------|-------------------------------|-------------------------------|-------------------------------|-------------------------------|
| SRPSAT06 | I am satisfied with my ability to do things for my family.....                                           | <input type="checkbox"/><br>1 | <input type="checkbox"/><br>2 | <input type="checkbox"/><br>3 | <input type="checkbox"/><br>4 | <input type="checkbox"/><br>5 |
| SRPSAT07 | I am satisfied with how much work I can do (include work at home).....                                   | <input type="checkbox"/><br>1 | <input type="checkbox"/><br>2 | <input type="checkbox"/><br>3 | <input type="checkbox"/><br>4 | <input type="checkbox"/><br>5 |
| SRPSAT08 | I feel good about my ability to do things for my family.....                                             | <input type="checkbox"/><br>1 | <input type="checkbox"/><br>2 | <input type="checkbox"/><br>3 | <input type="checkbox"/><br>4 | <input type="checkbox"/><br>5 |
| SRPSAT09 | I am satisfied with my ability to do the work that is really important to me (include work at home)..... | <input type="checkbox"/><br>1 | <input type="checkbox"/><br>2 | <input type="checkbox"/><br>3 | <input type="checkbox"/><br>4 | <input type="checkbox"/><br>5 |
| SRPSAT21 | I am satisfied with the amount of time I spend doing work (include work at home).....                    | <input type="checkbox"/><br>1 | <input type="checkbox"/><br>2 | <input type="checkbox"/><br>3 | <input type="checkbox"/><br>4 | <input type="checkbox"/><br>5 |
| SRPSAT22 | I am happy with how much I do for my family.....                                                         | <input type="checkbox"/><br>1 | <input type="checkbox"/><br>2 | <input type="checkbox"/><br>3 | <input type="checkbox"/><br>4 | <input type="checkbox"/><br>5 |
| SRPSAT24 | I am satisfied with my ability to work (include work at home).....                                       | <input type="checkbox"/><br>1 | <input type="checkbox"/><br>2 | <input type="checkbox"/><br>3 | <input type="checkbox"/><br>4 | <input type="checkbox"/><br>5 |

**In the past 7 days...**

|          |                                                                                            | <b>Not at all</b>             | <b>A little bit</b>           | <b>Somewhat</b>               | <b>Quite a bit</b>            | <b>Very much</b>              |
|----------|--------------------------------------------------------------------------------------------|-------------------------------|-------------------------------|-------------------------------|-------------------------------|-------------------------------|
| SRPSAT35 | The quality of my work is as good as I want it to be (include work at home) .....          | <input type="checkbox"/><br>1 | <input type="checkbox"/><br>2 | <input type="checkbox"/><br>3 | <input type="checkbox"/><br>4 | <input type="checkbox"/><br>5 |
| SRPSAT38 | I am satisfied with the amount of time I spend performing my daily routines.....           | <input type="checkbox"/><br>1 | <input type="checkbox"/><br>2 | <input type="checkbox"/><br>3 | <input type="checkbox"/><br>4 | <input type="checkbox"/><br>5 |
| SRPSAT39 | I am satisfied with my ability to do household chores/tasks.....                           | <input type="checkbox"/><br>1 | <input type="checkbox"/><br>2 | <input type="checkbox"/><br>3 | <input type="checkbox"/><br>4 | <input type="checkbox"/><br>5 |
| SRPSAT47 | I am satisfied with my ability to do regular personal and household responsibilities ..... | <input type="checkbox"/><br>1 | <input type="checkbox"/><br>2 | <input type="checkbox"/><br>3 | <input type="checkbox"/><br>4 | <input type="checkbox"/><br>5 |
| SRPSAT49 | I am satisfied with my ability to perform my daily routines.....                           | <input type="checkbox"/><br>1 | <input type="checkbox"/><br>2 | <input type="checkbox"/><br>3 | <input type="checkbox"/><br>4 | <input type="checkbox"/><br>5 |
| SRPSAT50 | I am satisfied with my ability to meet the needs of those who depend on me.....            | <input type="checkbox"/><br>1 | <input type="checkbox"/><br>2 | <input type="checkbox"/><br>3 | <input type="checkbox"/><br>4 | <input type="checkbox"/><br>5 |
| SRPSAT51 | I am satisfied with my ability to run errands.....                                         | <input type="checkbox"/><br>1 | <input type="checkbox"/><br>2 | <input type="checkbox"/><br>3 | <input type="checkbox"/><br>4 | <input type="checkbox"/><br>5 |
